1 **Plant-Necrotroph Co-transcriptome Networks Illuminate a Metabolic Battlefield**

2 **Wei Zhang<sup>1,2</sup>, Jason A. Corwin<sup>3</sup>, Daniel Copeland<sup>2</sup>, Julie Feusier<sup>2</sup>, Robert Eshbaugh<sup>2</sup>,**  
3 **David E. Cook<sup>1</sup>, Susana Atwell<sup>2</sup>, and Daniel J. Kliebenstein<sup>2,4\*</sup>**

4 <sup>1</sup>Department of Plant Pathology, Kansas State University, 1712 Claflin Road, Throckmorton  
5 Hall, Manhattan, KS, 66506, USA

6 <sup>2</sup>Department of Plant Sciences, University of California, Davis, One Shields Avenue, Davis, CA,  
7 95616, USA

8 <sup>3</sup>Department of Ecology and Evolution Biology, University of Colorado, 1900 Pleasant Street,  
9 334 UCB, Boulder, CO, 80309-0334, USA

10 <sup>4</sup>DynaMo Center of Excellence, University of Copenhagen, Thorvaldsensvej 40, DK-1871,  
11 Frederiksberg C, Denmark

12 **\*Correspondence:** Daniel J. Kliebenstein, Department of Plant Sciences, University of  
13 California, Davis, One Shields Ave, Davis, CA, 95616, USA.

14 [kliebenstein@ucdavis.edu](mailto:kliebenstein@ucdavis.edu)

15 Phone: 530-754-7775

16 Running title: Co-transcriptome Networks between *Arabidopsis* and *Botrytis cinerea*

17 Keywords: Host-pathogen Interaction, Pathosystem, *Arabidopsis*, *B. cinerea*, RNA-Seq, Gene  
18 Co-expression Network, Co-transcriptome

19

20

21

22

23

24

25 **Abstract**

26 A central goal of studying host-pathogen interaction research is to understand how the host and  
27 pathogen manipulate each other to promote their own fitness in a pathosystem. Co-  
28 transcriptomic approaches can simultaneously analyze dual transcriptomes during infection and  
29 provide a systematic map of the cross-kingdom communication between two species. Here we  
30 used the *Arabidopsis-B. cinerea* pathosystem to test how plant host and fungal pathogen  
31 interaction at the transcriptomic level during infection. We assessed the impact of natural genetic  
32 diversity in the pathogen and plant host by utilization of a collection of 96 isolates of *B. cinerea*  
33 infection on *Arabidopsis* wild-type and two mutants with jasmonate or salicylic acid  
34 compromised immunities. We identified ten *B. cinerea* gene co-expression networks (GCNs)  
35 that encode known or novel virulence mechanisms. We constructed a dual interaction network by  
36 combining four host- and ten pathogen-GCNs into a single network, which revealed potential  
37 connections between the fungal and plant GCNs involving both novel and conserved  
38 mechanisms. These co-transcriptome data shed lights on the potential mechanisms underlying  
39 host-pathogen interaction and illustrate the continued need for advancements of *in planta*  
40 analysis of dual-species dynamics.

41

42

43

44

45

46

47

48

49

## 50 INTRODUCTION

51 How a host and pathogen manipulate each other within a pathosystem to facilitate their own  
52 fitness remains a long-standing question. The difference between the pathogen's ability to infect  
53 and the host's ability to resist generates the resulting disease symptomology. This interaction  
54 forces host-pathogen dynamics to shape the genomes of the two species via adaptive responses  
55 to each other (Dangl and Jones, 2001; Bergelson et al., 2001; Benton, 2009; Kanzaki et al.,  
56 2012; Karasov et al., 2014). Plants have evolved a sophisticated set of constitutive and inducible  
57 immune responses to cope with constant selective pressures from antagonistic microbes (Jones  
58 and Dangl, 2006). Reciprocally, plant pathogens have also evolved a variety of different invasion  
59 and virulence strategies to disarm or circumvent plant defense strategies (Glazebrook, 2005;  
60 Toruno et al., 2016). This has resulted in complex relations between plant hosts and fungal  
61 pathogens for survival and fitness.

62 The plant innate immune system includes several functional layers with overlapping functions to  
63 detect and defend against phytopathogens. This multi-layer immune system can be categorized  
64 as a signal monitor system to detect invasion, local and systemic signal transduction components  
65 to elicit and coordinate responses, and defensive response proteins and metabolites focused on  
66 combatting the invading pathogen (Tsuda and Katagiri, 2010; Corwin and Kliebenstein, 2017).  
67 These functional layers, as well as the components within them, are highly interconnected and  
68 tightly regulated by the host plant to respond appropriately to various phytopathogens (Couto  
69 and Zipfel, 2016; Tang et al., 2017). For instance, Arabidopsis utilizes a complex signaling  
70 network to regulate the production of indole-derived secondary metabolites, such as camalexin  
71 and indole glucosinolates, that contribute to resistance against pathogens (Kliebenstein et al.,  
72 2005; Clay et al., 2009; Bednarek et al., 2009; Frerigmann et al., 2016; Xu et al., 2016; Mine  
73 et al., 2018). This layered immune system provides pathogens with numerous targets in the  
74 plant immune system that the pathogen can utilize, evade or attack. Most biotrophic pathogens,  
75 evolved from commensal microbes, attempt to dismantle the plant immune system by injecting  
76 effector proteins into host cells or the inter-cellular space (Dangl and Jones, 2001; Buttner and  
77 He, 2009; Stergiopoulos and de Wit, 2009). For example, the biotrophic bacterial pathogen  
78 *Pseudomonas syringae* can utilize the jasmonic acid (JA) signaling pathway through the  
79 production of a JA-mimic, coronatine, to enhance its fitness (Mittal and Davis, 1995; Brooks et  
80 al., 2005; Cui et al., 2018). Alternatively, necrotrophic pathogens, which often evolved from

81 environmental saprophytic microbes, can utilize toxic secondary metabolites, small secreted  
82 proteins, and small RNAs to aggressively attack host defenses while also defending against host-  
83 derived toxins (Choquer et al., 2007; Arbelet et al., 2010; Mengiste, 2012; Weiberg et al.,  
84 2013; Kubicek et al., 2014; Macheleidt et al., 2016). In addition, pathogens can directly resist  
85 downstream defenses as is done by *B. cinerea*, where it has an ATP-binding cassette (ABC)  
86 transporter BcatrB that provides resistance by exporting camalexin from the pathogen cell  
87 (Stefanato et al., 2009). This high level of interactivity between the immune system and  
88 pathogen virulence mechanisms generates the final level of disease severity. However, a  
89 functional description of this combative cross-kingdom communication between a plant host and  
90 necrotrophic pathogen remains elusive.

91 Co-transcriptomic approaches whereby the host and pathogen transcriptomes are simultaneously  
92 analyzed provide the ability to systematically map the cross-kingdom communication between  
93 plant hosts and their pathogens, both for individual genes and gene co-expression network  
94 (GCN) levels (Stuart et al., 2003; Musungu et al., 2016; Zhang et al., 2017; Lanver et al.,  
95 2018; McClure et al., 2018). Recent advances have enabled the measurement of pathogen *in*  
96 *planta* transcriptome. For example, co-transcriptome work within the biotrophic Arabidopsis-  
97 *Pseudomonas syringae* pathosystem has enabled the investigation of early effects on Arabidopsis  
98 host immunity and the consequent effects on bacterial growth (Nobori et al., 2018). The co-  
99 transcriptome methodology enabled the identification of a bacterial iron acquisition pathway that  
100 is suppressed by multiple plant immune pathways (Nobori et al., 2018). This shows the potential  
101 for new hypothesis to be generated by a co-transcriptome approach, but additional cases across  
102 diverse pathosystems are needed (Swierzy et al., 2017; Westermann et al., 2017; Lee et al.,  
103 2018).

104 The Arabidopsis-*B. cinerea* pathosystem is well suited for exploring plant-pathogen interaction  
105 to understand host defenses and necrotrophic virulence in ecological and agricultural settings. *B.*  
106 *cinerea* is a necrotrophic generalist pathogen that attacks a broad range of diverse plant hosts,  
107 including dicots, gymnosperms, and even bryophytes (Williamson et al., 2007). This  
108 necrotrophic pathogen is endemic throughout the world and can cause severe pre- and post-  
109 harvest losses in many crops. A high level of standing natural genetic variation within *B. cinerea*  
110 population is hypothesized to facilitate the extreme host range of *B. cinerea*. This genetic  
111 variation affects nearly all known *B. cinerea* virulence strategies, including penetration and

112 establishment, evading detection, and combatting/coping with plant immune responses (Atwell  
113 et al., 2015; Walker et al., 2015; Corwin, Subedy et al., 2016). For example, a key virulence  
114 mechanism is the secretion of phytotoxic secondary metabolites, including the sesquiterpene  
115 botrydial (BOT) and the polyketide botcinic acid (BOA) that trigger plant chlorosis and host cell  
116 collapse (Deighton et al., 2001; Colmenares et al., 2002; Wang et al., 2009; Rossi et al., 2011;  
117 Ascari et al., 2013; Porquier et al., 2016). These metabolites are linked to virulence, but some  
118 pathogenic field isolates fail to produce either compounds pointing to additional pathogenic  
119 strategies. The combination of a high level of genetic diversity and extensive recombination  
120 means that a population of *B. cinerea* is a mixed collection of virulence strategies that can be  
121 used to interrogate by the co-transcriptome.

122 In the present study, we used the Arabidopsis-*B. cinerea* pathosystem to test how the  
123 transcriptomes of the two species interact during infection and assess how natural genetic  
124 variation in the pathogen impacts disease development. Isolates were inoculated on Arabidopsis  
125 Col-0 wild-type (WT) in conjunction with immune-deficient hormone mutants *coi1-1* (jasmonate  
126 defense signaling) and *npr1-1* (salicylic acid defense signaling). For the pathogen, we utilized a  
127 collection of 96 isolates of *B. cinerea* that harbor a wide scope of natural genetic variation within  
128 the species (Atwell et al., 2015; Corwin, Subedy et al., 2016; Zhang et al., 2016; Corwin,  
129 Copeland et al., 2016; Zhang et al., 2017; Soltis et al., 2018; Fordyce et al., 2018). From  
130 individual infected leaves, we simultaneously measured both the Arabidopsis and *B. cinerea*  
131 transcripts at 16 hours post-infection (HPI). We have previously analyzed the Arabidopsis  
132 transcripts to identify four host-derived GCNs that are sensitive to natural genetic variation in *B.*  
133 *cinerea* (Zhang et al., 2017). In present analysis, we identified ten fungal pathogen-derived  
134 GCNs that encode either known or novel virulence mechanisms within the species. Some of  
135 these *B. cinerea* GCNs responsible for BOT production, exocytosis regulation and copper  
136 transport are highly linked with the host's defense phytohormone pathways. By combining the  
137 plant host- and pathogen-GCNs into a single network, we constructed a dual-transcriptomic  
138 network that identifies potential interactions between the components of plant host innate  
139 immune system and fungal pathogen virulence. These connections highlight potential targets for  
140 fungal pathogen phytotoxins and prevailing counter-responses from plant host. Collectively,  
141 these data shed lights on the potential mechanisms underlying how the host and pathogen combat  
142 each other during infection and illustrate the continued need for advancements of *in planta*  
143 analysis of dual-species interaction.

## 144 RESULTS

### 145 Genetic Variation in Pathogen and Hosts Influence *B. cinerea* Transcriptome

146 To investigate how genetic variation within a pathogen differentially interacts with plant host  
147 immunity at the transcriptomic level, we profiled the *in planta* transcriptomes of 96 *B. cinerea*  
148 isolates infection across three host genotypes, the Arabidopsis accession Col-0 WT and two  
149 immune-signaling mutants *coil-1* and *npr1-1* that are respectively compromised in JA or  
150 salicylic acid (SA) driven immunity. This previously described collection of 96 isolates  
151 represents a broad geographical distribution and contains considerable natural genetic variation  
152 that affects a diversity of virulence strategies within *B. cinerea* (Denby et al., 2004; Rowe and  
153 Kliebenstein, 2007; Atwell et al., 2015; Corwin, Subedy et al., 2016; Zhang et al., 2016). Four  
154 independent biological replicates across two separate experiments per isolate/genotype pair were  
155 harvested at 16 HPI for transcriptome analysis. A total of 1,152 independent RNA samples were  
156 generated for library preparation and sequenced on Illumina HiSeq platform (NCBI accession  
157 number SRP149815). These libraries were previously used to study Arabidopsis transcriptional  
158 responses to natural genetic variation in *B. cinerea* (Zhang et al., 2017). Mapping the dual-  
159 transcriptome reads against the *B. cinerea* reference genome (B05.10), we identified 9,284  
160 predicted gene models with a minimum of either 30 gene counts in one isolate or 300 gene  
161 counts across 96 isolates. The total of identified genes corresponds to ~79% of the 11,701  
162 predicted encoding genes in B05.10 reference genome (Supplemental Data Set 1 to 3) (Van Kan  
163 et al., 2017). The two different thresholds allowed the identification of pathogen transcripts that  
164 express only in a specific isolate.

165 Measuring the abundance of individual pathogen transcripts in relation to the host transcripts can  
166 be used as a molecular method to estimate fungal biomass (Blanco-Ulate et al., 2014). Given  
167 this, we hypothesized that the fraction of total reads that map to *B. cinerea* might be a  
168 biologically relevant indicator of pathogen virulence (Supplemental Data Set 4). Comparing *B.*  
169 *cinerea* transcript abundance at 16 HPI to lesion development at 72 HPI revealed a significant  
170 partial correlation in the WT Col-0 ( $R^2 = 0.1101$ ,  $P$ -value = 0.0016, Figure 1). In contrast to WT,  
171 the early transcriptomic activities of most *B. cinerea* isolates were more vigorous in the two  
172 Arabidopsis mutants, resulting in a significant curvilinear relationship between total fraction of  
173 *B. cinerea* reads and final lesion area ( $P$ -value =  $3.914e-07$ ,  $P$ -value = 0.0001, respectively,



174 Figure 1). Interestingly, the total reads fraction was better correlated with final lesion area in  
175 *coi1-1* ( $R^2 = 0.2562$ ) than either WT ( $R^2 = 0.1101$ ) or *npr1-1* ( $R^2 = 0.161$ ). This suggests that  
176 early transcriptomic activity from the pathogen can be a partial indicator of pathogen virulence,  
177 but also depends on the respective resistance from the plant host.

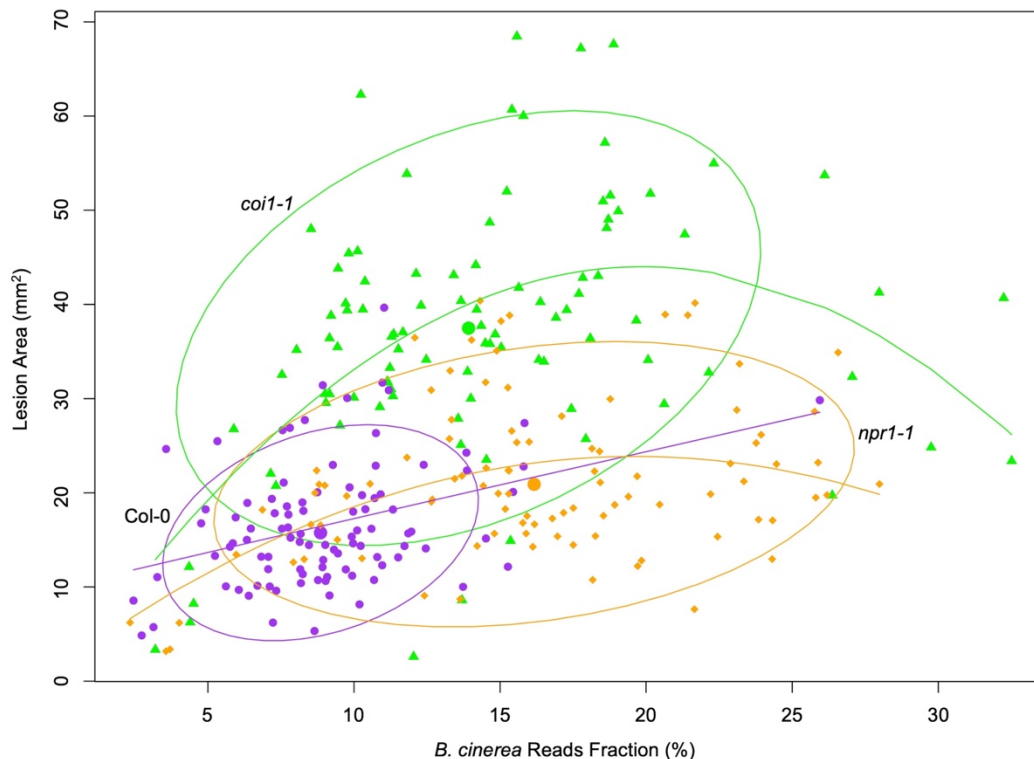

**Figure 1. Correlation between earlier estimated *B. cinerea* biomass and later lesion area.** Model-corrected lesion area means were estimated using the linear model on the six replicates data from three Arabidopsis genotypes at 72-hours post-infection with 96 *B. cinerea* isolates. Estimated biomass of *B. cinerea* was calculated using the linear model-corrected fraction of *B. cinerea* mapped reads against total mapped reads to Arabidopsis and *B. cinerea* reference genomes. RNA-Seq analysis was conducted at 16-hours post-infection for each pathosystem. Three Arabidopsis genotypes are wild-type Col-0 (purple dot), jasmonate insensitive mutant *coi1-1* (green triangle), and salicylic acid insensitive mutant *npr1-1* (orange diamond). The 90% confidence ellipse intervals are plotted for each Arabidopsis genotype for references. Quadratic regression lines are: Col-0:  $y = -0.00059x^2 + 0.729x + 10.037$ ,  $P = 0.0016$ , adjusted  $R^2 = 0.1101$ ; *coi1-1*:  $y = -0.117x^2 + 4.44x - 0.1585$ ,  $P = 3.914e-07$ , adjusted  $R^2 = 0.2562$ ; *npr1-1*:  $y = -0.0579x^2 + 2.26x + 1.673$ ,  $P = 0.0001$ , adjusted  $R^2 = 0.161$ .

178

179 Plant defense phytohormone networks, like SA and JA, help shape the immune responses of a  
180 plant host while also shape the virulence gene expression within bacterial pathogens, such as  
181 *Pseudomonas syringae* (Nobori et al., 2018). To test how variation in host SA/JA-signaling  
182 influences the fungal pathogen transcriptome, we applied a generalized linear model linked with  
183 negative-binomial function (nbGLM) to each *B. cinerea* transcript across the experiment. This  
184 analysis allowed us to estimate the relative broad-sense heritability ( $H^2$ ) of genetic variation from

185 the pathogen, plant host, or their interaction contributing to each transcript. Of the 9,284  
186 detectable *B. cinerea* transcripts, 8,603 and 5,244 transcripts were significantly influenced by  
187 genetic variation in pathogen and host, respectively (74% and 45% of predicted *B. cinerea* gene  
188 models, respectively) (Figure 2A, Supplemental Data Set 3 and 5). While this result shows that  
189 the plant phytohormone pathways influence *B. cinerea* gene expression, the variation in host  
190 defense responses (average  $H^2_{\text{Host}} = 0.010$ ) has far less influence on *B. cinerea* gene expression  
191 than that of the pathogens' own natural genetic variation (average  $H^2_{\text{Isolate}} = 0.152$ ). The host  
192 defense hormones also affected *B. cinerea* gene expression in a genotype-by-genotype dependent  
193 manner on 4,541 genes (39% of *B. cinerea* predicted gene models, average  $H^2_{\text{Isolate} \times \text{Host}} = 0.116$ )  
194 (Figure 2B-2I). Thus, pathogen natural genetic variation has a larger impact on pathogen  
195 transcriptional responses *in planta* than variation in host defense responses.



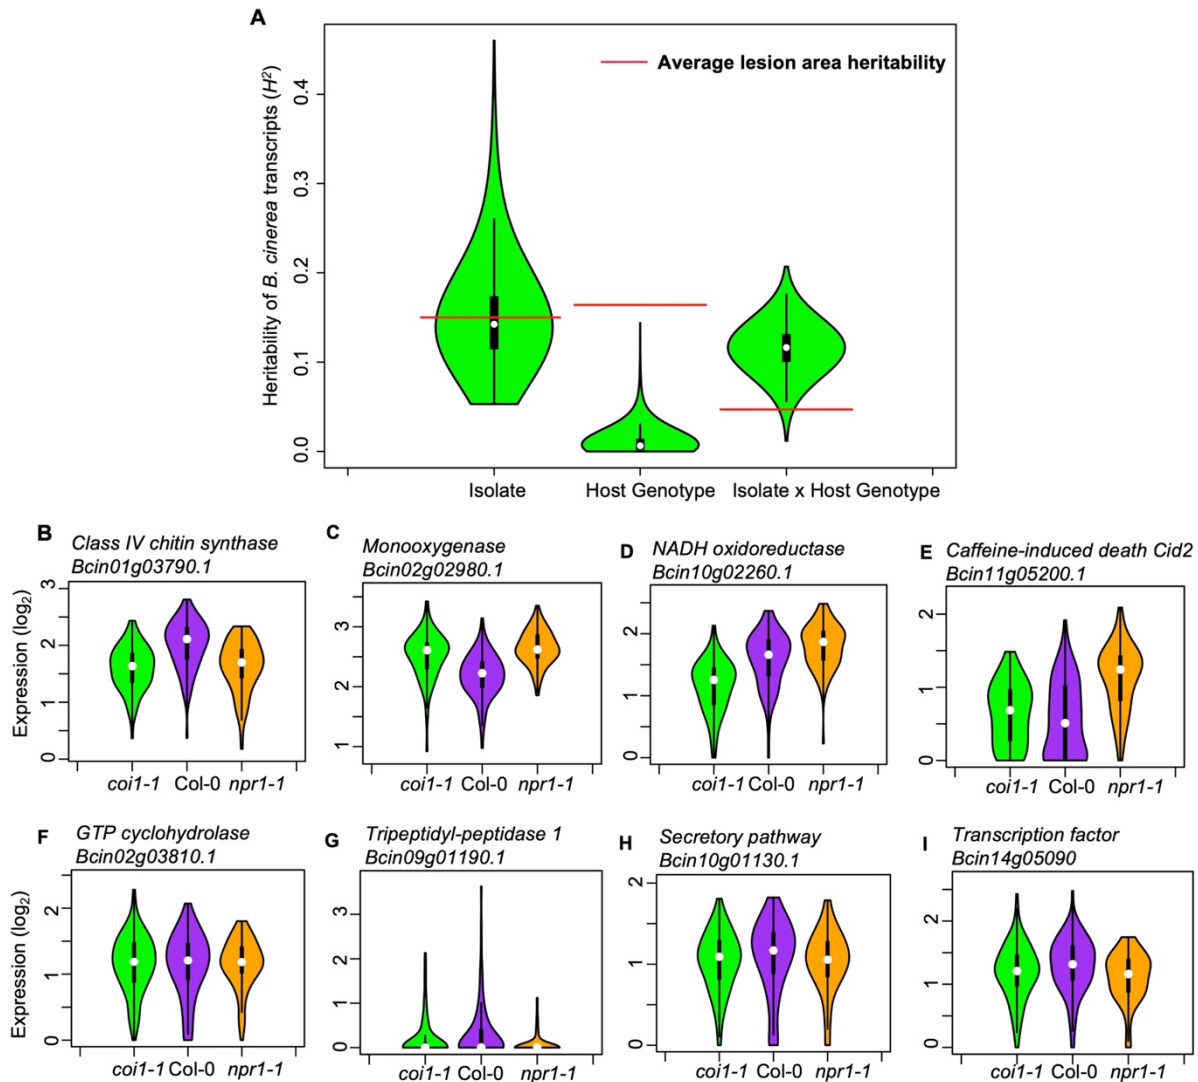

**Figure 2. Transcriptomic responses of *B. cinerea* on Arabidopsis are controlled by genetic variation in pathogen population, host genotypes, and their interaction.** (A) Distribution of broad-sense heritability ( $H^2$ ) of *B. cinerea* transcripts contributed by genetic variation in the *B. cinerea*, Arabidopsis genotypes, and the interaction between pathogen and host. Violin plots illustrating the distribution of  $H^2$  for transcripts from 96 *B. cinerea* isolates infecting on Arabidopsis genotypes. Heritability is partitioned across the different sources, 96 pathogen genotypes = "Isolate", plant genotypes Col-0, *coi1-1* and *npr1-1* plant genotypes = "Host", and the corresponding interaction. The transcriptomic analysis was conducted by sequencing mRNA extracted from *B. cinerea* infected Arabidopsis leaves at 16-hours post-infection. Red lines indicate the average broad-sense heritability values of lesion area caused by isolates, Arabidopsis genotypes, and their interaction. (B) to (E) Expression profiles of *B. cinerea* transcripts significantly influenced by host genotypes. The model-corrected means ( $\log_2$ ) for *B. cinerea* transcript were used for plotting. The Arabidopsis genotypes, wild-type Col-0 (purple), jasmonate insensitive mutant *coi1-1* (green), and salicylic acid mutant *npr1-1* (orange), are shown on the x axis. *B. cinerea* transcripts are: (B) *Bcin01g03790.1*, class IV chitin synthase; (C) *Bcin02g02980.1*, Monoxygenase; (D) *Bcin10g02260.1*, NADH oxidoreductase; (E) *Bcin11g05200.1*, caffeine-induced death *Cid2*; (F) to (I) Expression profiles of *B. cinerea* transcripts significantly influenced by the interaction between pathogen and host genotypes. (F) *Bcin02g03810.1*, GTP cyclohydrolase; (G) *Bcin09g01190.1*, Tripeptidyl-peptidase 1; (H) *Bcin10g01130.1*, in secretory pathway; (I) *Bcin14g05090.1*, a transcription factor.

## 197 Identification of Virulence Factors Among the Early *B. cinerea* Transcripts

198 This data set also allows us to test for specific *B. cinerea* transcripts whose early expression is  
199 associated with later lesion development. These genes can serve as potential biomarkers of  
200 overall pathogen virulence and may elucidate the functional mechanisms driving early virulence  
201 in the interaction. To find individual pathogen transcripts link with lesion development, we  
202 conducted a genome-wide false discovery rate-corrected Spearman's rank correlation analysis  
203 between 72 HPI lesion area and individual *B. cinerea* transcripts accumulation at 16 HPI. We  
204 identified 2,521 genes (22% of *B. cinerea* predicted gene models) with significant positive  
205 correlations and 114 genes (1% of *B. cinerea* predicted gene models) with significant negative  
206 correlations to lesion area across three Arabidopsis genotypes, respectively ( $P$ -value < 0.01,  
207 Supplemental Data Set 6). The top 20 positively correlated *B. cinerea* genes contained all seven  
208 genes involved in BOT biosynthesis (Deighton et al., 2001; Colmenares et al., 2002; Wang et  
209 al., 2009; Rossi et al., 2011; Ascari et al., 2013; Porquier et al., 2016). In addition to  
210 phytotoxins, more than 30 genes of the top 100 lesion-correlated genes encode plant cell wall  
211 degrading enzymes, i.e., glucosyl hydrolases, carbohydrate esterases, cellobiose dehydrogenases  
212 and polygalacturonase (Supplemental Data Set 6) (Gerbi et al., 1996; Zamocky et al., 2006;  
213 Cantarel et al., 2009; Van Vu et al., 2012; Igarashi et al., 2014; Ingo Morgenstern et al., 2014;  
214 Blanco-Ulate et al., 2014; Tien-chye Tan et al., 2015; Courtade et al., 2016; Nelson et al.,  
215 2017; Pérez-Izquierdo et al., 2017). For example, the gene encoding the well-studied  
216 polygalacturonase 1 (*Bcpg1*) showed a dramatic expression variation across 96 isolates under  
217 different host immunities (Figure 3 and Supplemental Data Set 1). Additional 10 of the top 100  
218 lesion-correlated genes were annotated encoding putative peptidase activities, which are critical  
219 for fungal virulence (Movahedi et al., 1991; Poussereau et al., 2001; ten Have et al., 2004; ten  
220 Have et al., 2010). A final classical virulence gene in the top 100 gene list is *Bcoah*  
221 (*Bcin12g01020*) encoding oxaloacetate acetyl hydrolase, which is a key enzyme in oxalic acid  
222 biosynthesis and positively contributes to virulence (Supplemental Figure 1 and Supplemental  
223 Data Set 6) (Greenberg et al., 1994; Williamson et al., 2007; Walz et al., 2008; Schumacher et  
224 al., 2012; Schumacher et al., 2015; Tayal et al., 2017). In addition, this method identified 37 of  
225 the top 100 lesion-correlated genes with no gene ontology (GO) terms, which likely represent  
226 unknown virulence mechanisms (Supplemental Data Set 6). Thus, this approach readily  
227 identifies known and novel pathogen virulence functions.

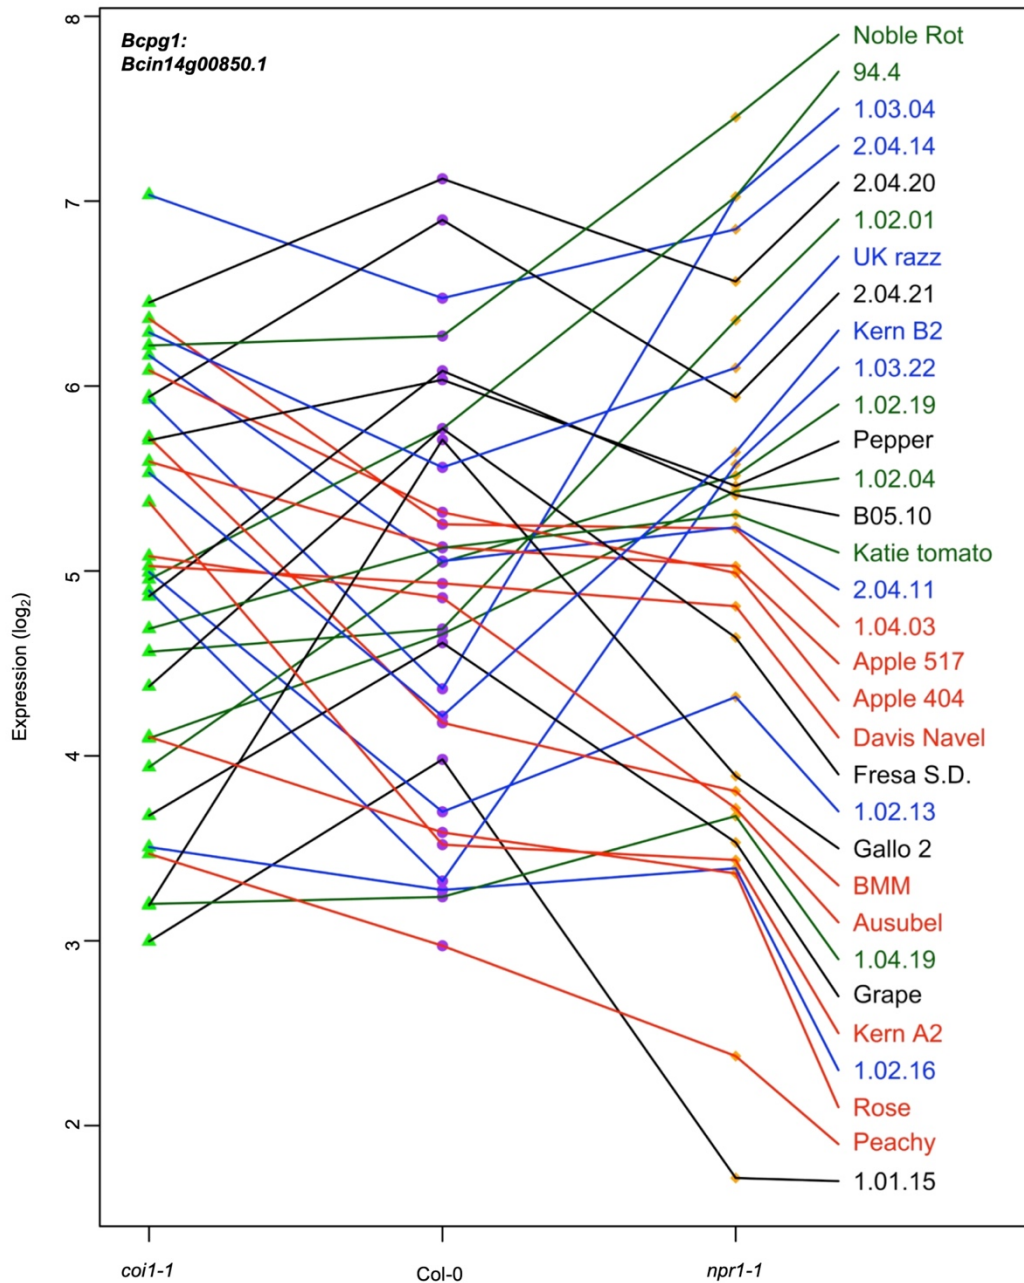

**Figure 3. Expression profiles of an endopolygalacturonase gene *Bcp1* from diverse *B. cinerea* isolates across Arabidopsis genotypes.** Rank plot shows the relationship of *Bcp1* expression from 32 diverse *B. cinerea* isolates (right) across three Arabidopsis genotypes (x axis). Three Arabidopsis genotypes are wild-type Col-0 (purple dot), jasmonate insensitive mutant *coi1-1* (green triangle), and salicylic acid mutant *npr1-1* (orange diamond). The model-corrected means ( $\log_2$ ) for the transcript of *Bcp1* (*Bcin14g00850.1*) encoding an endopolygalacturonase gene are utilized for plotting. The transcript expression levels from the same isolate across three Arabidopsis genotypes are connected with a colored line. The names of 32 isolates are represented with the same colored lines as induced *Bcp1* expression levels. Black lines indicate the expression levels of *Bcp1* are higher in *coi1-1* and *npr1-1* than in Col-0. Red lines indicate the higher expression levels of *Bcp1* in *coi1-1* but lower in *npr1-1*. Blue lines indicate the highest expression levels of *Bcp1* are in Col-0. Dark green lines indicate the higher expression levels of *Bcp1* in *npr1-1* but lower in *coi1-1*.

## 229 ***In Planta* Virulence Gene Co-expression Networks (GCNs) in *B. cinerea***

230 To develop a systemic view of fungal pathogen *in planta* gene expression, we used a co-  
231 expression approach to identify *B. cinerea* networks that associated with growth and virulence *in*  
232 *planta*. Using solely *B. cinerea* transcriptome at 16 HPI from Arabidopsis Col-0 WT infected  
233 leaves, we calculated Spearman's rank correlations of gene counts across all *B. cinerea* isolates,  
234 filtered gene pairs with correlation greater than 0.8. We then used the filtered gene pairs as input  
235 to construct GCNs. We identified ten distinct GCNs containing more than five *B. cinerea* genes  
236 (Figure 4, Supplemental Table 1, Supplemental Figure 2 and Supplemental Data Set 7). The  
237 largest GCN with 242 genes contains members responsible for phospholipid synthesis, eisosome  
238 function, and membrane-associated stress signaling pathways (Figure 4-Vesicle/virulence). The  
239 biological function of this GCN suggests its role in fungal membrane- and vesicle-localized  
240 processes, which are normally involved with general hyphae growth, fungal cell wall deposition,  
241 and exudation of fungal toxins to the intercellular space (Supplemental Data Set 7). The second  
242 largest network contains 128 genes that were entirely associated with translation and protein  
243 synthesis (Figure 4-Translation/growth and Supplemental Data Set 7). Of the smaller GCNs  
244 identified (5-20 genes), five networks were identified with genes distributed across *B. cinerea* 16  
245 chromosomes, suggesting that these GCNs arise from coordinated trans-regulation (Figure 4-  
246 Trans-networks and Supplemental Figure 3D, 3F, 3H-3G). These networks are associated with  
247 diverse array of virulence functions, including the regulation of exocytosis, copper transport, the  
248 production of peptidases and isoprenoid precursors (IPP), and polyketide secretion.



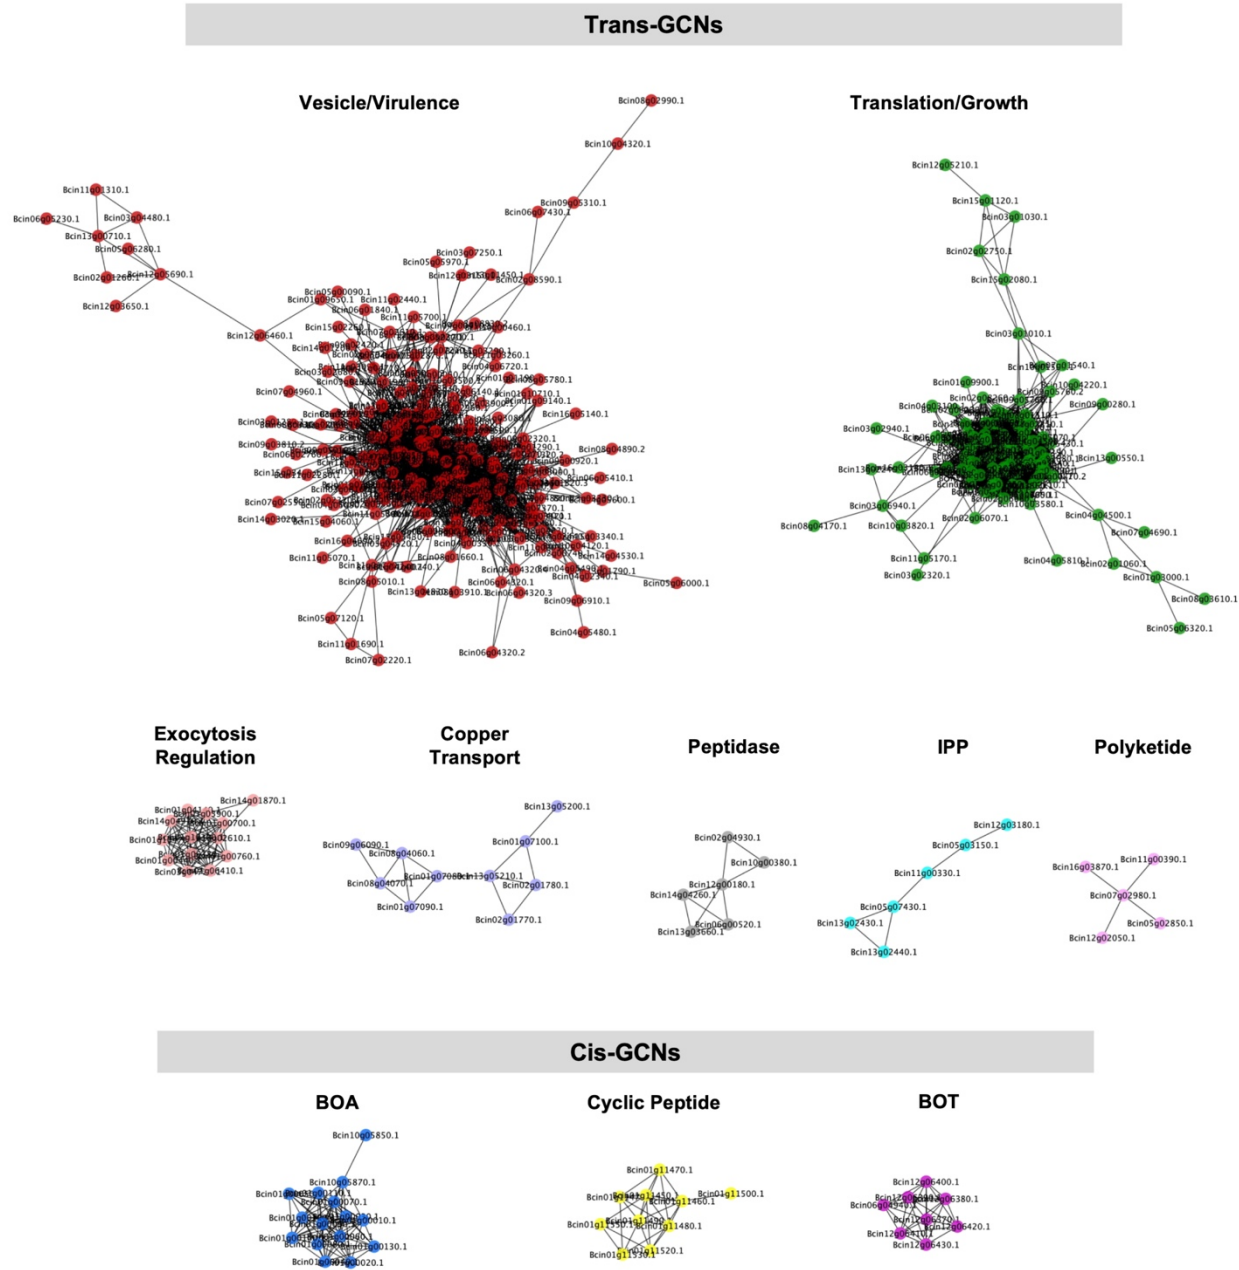

**Figure 4. Gene co-expression networks identified from *B. cinerea* transcriptomic responses to Arabidopsis wild-type Col-0 immunity.** Ten gene co-expression networks (GCNs) with more than five nodes were identified from 96 *B. cinerea* isolates infecting Arabidopsis wild-type Col-0. The similarity matrix is computed using Spearman's rank correlation coefficient. Nodes with different colors represent *B. cinerea* genes condensed in GCNs with different biological functions. Edges represent the Spearman's rank correlation coefficients between gene pairs. Trans- and cis-GCNs means GCNs are regulated by trans- and cis-regulatory elements, respectively. GCNs were named after their biological functions, which were determined by hub and bottleneck genes within each network. GCNs are: vesicle/virulence (red), translation/growth (green), exocytosis regulation (pink), cyclic peptide (yellow), peptidase (gray), isopentenyl pyrophosphate (IPP, turquoise), polyketide (violet), botcinic acid (BOA, blue), copper transport (slate blue), botrydial (BOT, purple).

250 In contrast to the whole-genome distributed GCNs, three of the smaller GCNs were comprised of  
251 genes tandemly clustered within a single chromosome (Figure 4-BOA, -Cyclic Peptide, -BOT,  
252 Supplemental Figure 3C, 3E, and 3G). A functional analysis showed that all of the genes within  
253 these networks encoded known or putative biosynthetic enzymes for specialized metabolic  
254 pathways. For example, seven genes responsible for BOT biosynthesis cluster on chromosome  
255 12 and form a small GCN with a Zn(II)2Cys6 transcription factor that is specific to the pathway  
256 (Figure 5A, 5B, Supplemental Figure 3G and Supplemental Data Set 7) (Siewers et al., 2005;  
257 Pinedo et al., 2008; Urlacher and Girhard, 2012; Moraga et al., 2016). Similarly, all 13 genes  
258 involved in BOA biosynthesis cluster in Chromosome 1 and form a highly connected GCN  
259 (Figure 4-BOA, Figure 5E, Supplemental Figure 3C and Supplemental Data Set 7) (Dalmais et  
260 al., 2011). In addition to previously characterized secondary metabolic pathways, we identified  
261 an uncharacterized set of ten genes that cluster on Chromosome 1 (Figure 4-Cyclic Peptide,  
262 Figure 5F, Supplemental Figure 3E and Supplemental Data Set 7). These genes share  
263 considerable homology with enzymes related to cyclic peptide biosynthesis and may represent a  
264 novel secondary metabolic pathway in *B. cinerea* (Supplemental Data Set 7). The expression of  
265 these pathways *in planta* was extremely variable among the isolates and included some apparent  
266 natural knockouts in the expression of the entire biosynthetic pathway (Figure 5G and  
267 Supplemental Data Set 1). Isolate 94.4 was the sole genotype lacking the entire BOT pathway,  
268 while 19 isolates and 24 isolates did not transcribe the respective BOA and the putative cyclic  
269 peptide pathways (Figure 5E to 5G and Supplemental Data Set 1). We decomposed the  
270 expression of these pathways into expression vectors, referred to as eigengenes, using a principle  
271 component analysis and used a linear mixed model to test for a relationship between early  
272 expression of secondary metabolic pathways and later lesion area. This showed a significant  
273 relationship between the expression of BOT and BOA pathways and later lesion area  
274 (Supplemental Table 2). In contrast, the putative cyclic peptide pathway was only associated  
275 with lesion development in a BOT-dependent manner, suggesting that it may have a synergism  
276 to BOT (Supplemental Table 2). Thus, *in planta* analysis of the fungal transcriptome can identify  
277 known and novel potential virulence mechanisms and associate them with the resulting  
278 virulence.

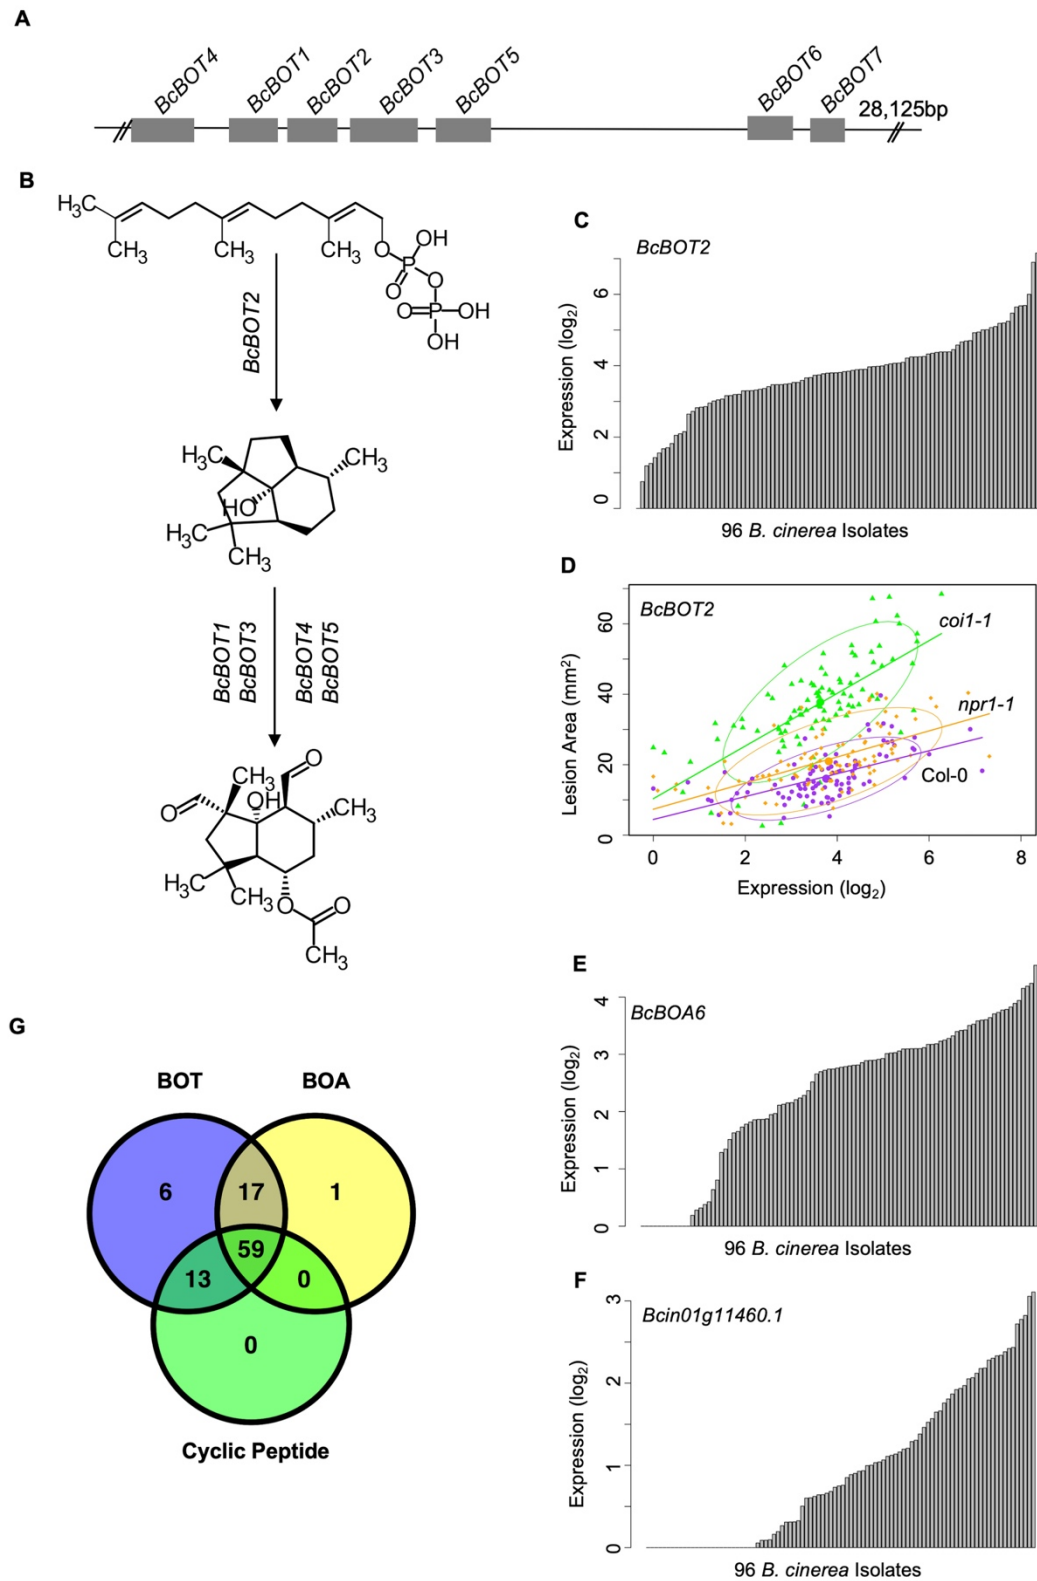



**Figure 5. Variation of transcripts accumulation for secondary metabolites production across diverse *B. cinerea* isolates.** Expression profiles of genes responsible for botrydial, botcinic acid, cyclic peptide production across 96 isolates under Arabidopsis wild-type Col-0 are shown. (A) Schematic shows the genomic locus of seven botrydial (BOT) biosynthesis genes clustered together. Exons are represented by gray boxes. Introns and intergenic regions are represented by the grey line. Seven BOT genes are: *BcBOT1*, *BcBOT3* and *BcBOT4*, encoding a cytochrome P450 monooxygenase, respectively; *BcBOT2* encoding a sesquiterpene cyclase; *BcBOT5* encoding an acetyl transferase; *BcBOT6* encoding a Zn(II)2Cys6 transcription factor, *BcBOT7* encoding a dehydrogenase reductase. (B) BOT biosynthesis pathway in *B. cinerea*. (C) Bar plots compare expression variation of *BcBOT2* across 96 *B. cinerea* isolates in responding to Arabidopsis wild-type Col-0 immunity. The model-corrected means ( $\log_2$ ) of transcripts were used for plotting. (D) Scatter plot illustrates the positive correlations between lesion area and accumulation of *BcBOT2* transcript across the 96 isolates in response to varied Arabidopsis immunities. Model-corrected lesion area means were estimated for three Arabidopsis genotypes at 72-hours post-infection with 96 *B. cinerea* isolates. The three Arabidopsis genotypes are labeled next to the confidence ellipse curves: wild-type Col-0 (purple dot), jasmonate insensitive mutant *coi1-1* (green triangle), and salicylic acid mutant *npr1-1* (orange diamond). The 90% confidence ellipse intervals are plotted for each Arabidopsis genotype for reference. Linear regression lines: Col-0:  $y = 3.2532x + 4.4323$ ,  $P = 1.008e-10$ , Adjusted  $R^2 = 3.3537$ ; *coi1-1*:  $y = 7.4802x + 10.3289$ ,  $P = 7.895e-15$ , adjusted  $R^2 = 0.4700$ ; *npr1-1*:  $y = 3.7086x + 7.3487$ ,  $P = 2.425e-11$ , adjusted  $R^2 = 0.3726$ . (E) and (F) Bar plots compare expression variation of *BcBOA6* in botcinic acid (BOA) pathway and *Bcin01g11460*. in cyclic peptide pathway across 96 *B. cinerea* isolates in response to Arabidopsis wild-type Col-0 immunity. (G) Venn diagram illustrates the number of *B. cinerea* isolates with the ability to induce BOT, BOA, and cyclic peptide.

280

## 281 Covariation of Fungal Virulence Networks Under Differing Plant Immune Responses

282 The *B. cinerea* GCNs measured within Arabidopsis WT provide a reference to investigate how  
283 phytohormone-signaling in host innate immunity may shape the pathogen's transcriptional  
284 responses during infection. Comparing the *B. cinerea* GCN membership and structure across the  
285 three Arabidopsis genotypes (WT, *coi1-1*, and *npr1-1*) showed that the core membership within  
286 networks was largely maintained but the specific linkages within and between GCNs were often  
287 variable (Figure 6, Supplemental Table 1, Supplemental Figure 2, 4 and 5, and Supplemental  
288 Data Set 7). For example, the two largest *B. cinerea* GCNs in WT developed multiple co-  
289 expression connections during infection in the JA-compromised *coi1-1* host. In the SA-  
290 compromised *npr1-1*, however, these GCNs maintained their partition but the membership  
291 within each GCN shrunk (Figure 6 and Supplemental Table 1). In contrast, some GCNs are  
292 highly robust in both gene content and topology structure across three host genotypes, including  
293 three GCNs associated with BOT, BOA and cyclic peptide production, and GCNs associated  
294 with exocytosis regulation, copper transport, and peptidase activity (Supplemental Table 1,  
295 Supplemental Figure 2, 4 and 5, and Supplemental Data Set 7). In addition, we also identified  
296 additional small GCNs that demonstrated host specificity in *coi1-1* (Supplemental Figure 4 and  
297 Supplemental Data Set 7). In particular, there were four small GCNs that are associated with  
298 plant cell wall degradation, siderophores, glycolysis, ROS, and S-adenosylmethionine  
299 biosynthesis. Thus, the coordinated transcriptional responses of *B. cinerea* GCNs are at least  
300 partially dependent on variation in the host immune response.

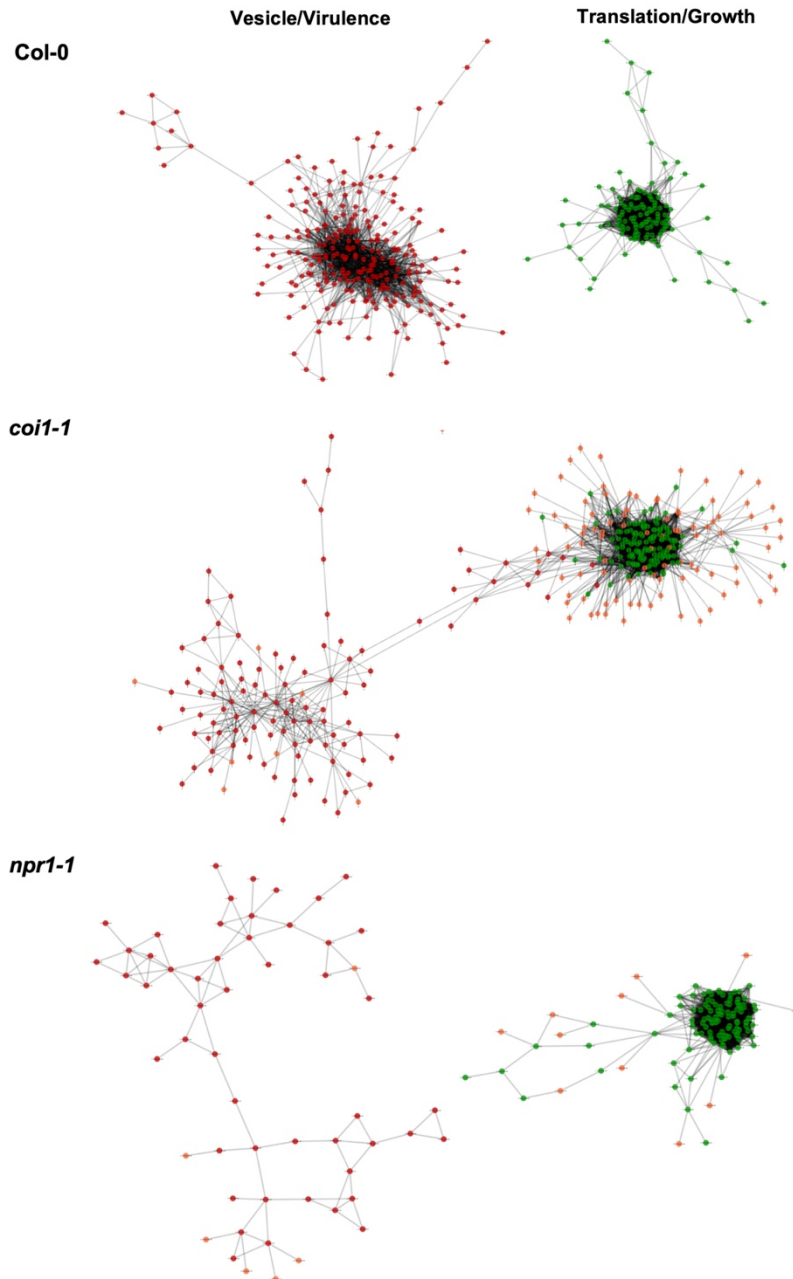

**Figure 6. Comparison of plasticity of *B. cinerea* gene co-expression network under varied host immunity.** *B. cinerea* gene co-expression networks (GCNs) of vesicle/virulence (red) and translation/growth (green) identified under three Arabidopsis genotypes are compared. Three Arabidopsis genotypes are wild-type Col-0, jasmonate insensitive mutant *coi1-1*, and salicylic acid mutant *npr1-1*. Nodes marked with red and green colors represent *B. cinerea* genes condensed in GCNs with different biological functions. The same node condensed in GCNs across three Arabidopsis genotypes was marked with same color. Nodes specifically condensed in GCNs under two mutants *coi1-1* and *npr1-1* background are marked with orange color. Edges represent the Spearman's rank correlation coefficients between gene pairs.

302 Host immunities showed different impacts on expression profiles of genes condensed in  
303 individual *B. cinerea* GCNs (Supplemental Figure 6). Compared with WT, expression profiles of  
304 genes within the largest membrane/vesicle virulence GCN were elevated in the SA- and JA-  
305 compromised Arabidopsis mutants on average (Supplemental Figure 6A). Fungal genes  
306 associated with copper transport and polyketide production were upregulated under SA-  
307 compromised host immunity (Supplemental Figure 6F and 6J). Whereas, members of GCNs  
308 responsible for plant cell wall degradation and siderophore biosynthesis were upregulated under  
309 JA-compromised host immunity (Supplemental Figure 6K and 6L). Finally, GCNs associated  
310 with BOT and exocytosis regulation showed robust gene expression profiles across all three  
311 Arabidopsis genotypes (Supplemental Figure 6D and 6G). The above observation indicates host  
312 immunity influences the *B. cinerea* transcriptional response of *B. cinerea* and suggests that *B.*  
313 *cinerea* isolates have varied abilities to tailor virulence strategy in response to host immunity.

#### 314 **A Dual Interaction Network Reveals Fungal Virulence Components Targeting Host** 315 **Immunity**

316 To begin assessing how two species influence each other's gene expression during infection, we  
317 constructed a co-transcriptome network using both host- and pathogen-derived GCNs. We  
318 converted the ten *B. cinerea* GCNs and the four Arabidopsis GCNs into eigengene vectors that  
319 capture the variation of the general expression of all genes within a GCN into a single value  
320 (Zhang et al., 2017). We calculated Spearman's rank coefficients among each GCN eigengene  
321 pairs without regard for the species. In this dual transcriptome network, the Arabidopsis/*B.*  
322 *cinerea* GCN eigengenes are displayed as nodes and positive/negative correlations between the  
323 GCNs as edges (Figure 7). Of the host-derived GCNs, the Arabidopsis Defense/camalexin and  
324 Photosystem I (PSI) GCNs have a higher degree of centrality within the dual interaction  
325 network, suggesting that they have the most interactions with *B. cinerea* GCNs. The fungal  
326 GCNs highest degrees were associated with the exocytosis regulation, BOT, and IPP, which  
327 further illustrating the importance of specialized metabolism exudation in pathogen virulence.  
328 Interestingly, fungal GCNs (copper transport, exocytosis regulation, BOT and IPP biosynthesis)  
329 that were positively correlated with the host Defense/camalexin GCN showed negative  
330 correlations with PSI eigengene. The opposite relationships between pathogen- and host-  
331 GCNs suggest that these fungal GCNs may target plant PSI while the plant counters this attack  
332 using the Defense/camalexin GCN. To test if these connections were dependent upon the host

333 immunity, we used the eigengene values derived from fungal GCNs to conduct mixed linear  
334 modelling of how they were linked to variation in the host genotype and/or host GCNs  
335 (Supplemental Table 3 and 4). Some *B. cinerea* GCNs (Vesicle/virulence and TSL/growth, etc.)  
336 were affected by variation in the host genotypes but others showed host-independent manner  
337 (BOT, copper transport, etc.). Critically, the connections between pathogen- and host-GCNs  
338 were largely independent of the host genotypes, suggesting that the dual interaction network is a  
339 relatively robust structure (Supplemental Table 3 and 4). Collectively, pathogen virulence and  
340 host immunity GCNs showed complex connections within dual interaction network identified  
341 from co-transcriptome data, suggesting functional relationships between host defense and  
342 pathogen virulence mechanisms for future experimentation.

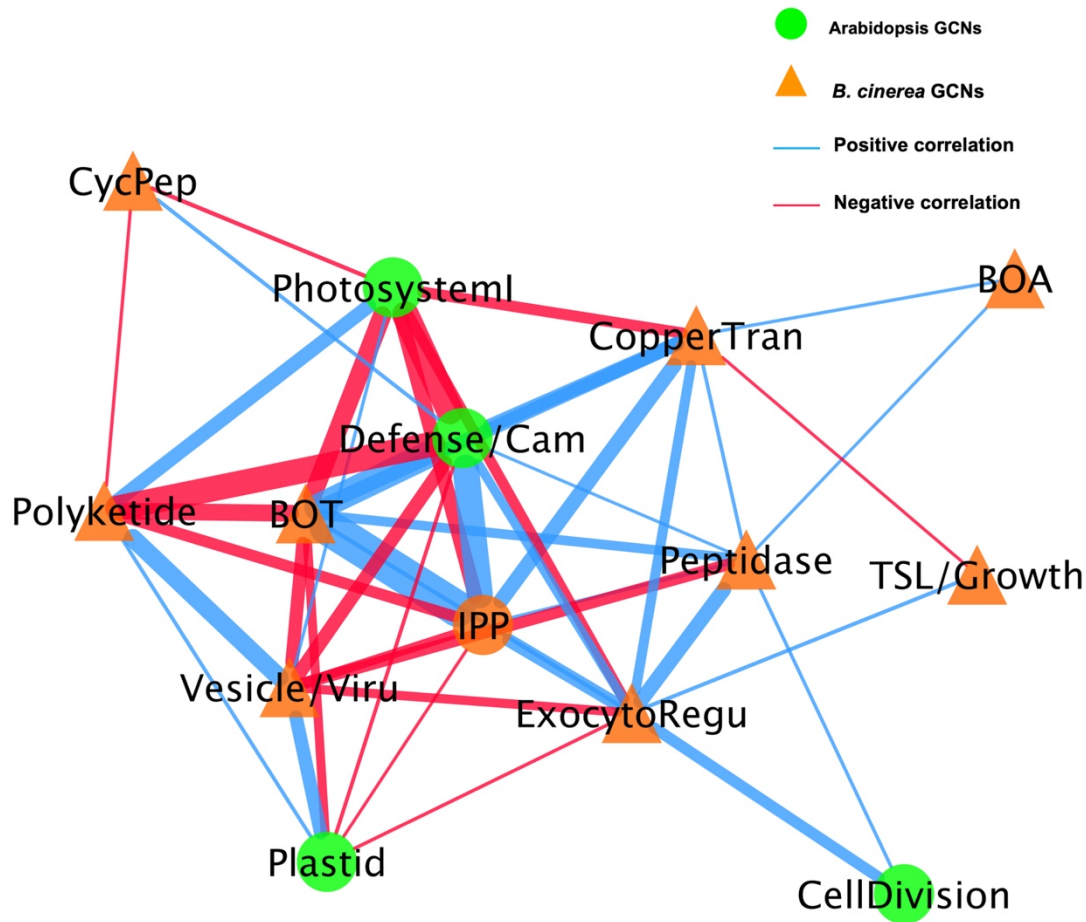

**Figure 7. A dual interaction network reveals links between Arabidopsis immunity and *B. cinerea* virulence.** A dual interaction network was constructed using gene co-expression networks (GCNs) from Arabidopsis and *B. cinerea* co-transcriptome. The first eigenvectors were derived from individual GCNs and used as input to calculate Spearman's rank correlation coefficient between GCN pairs. Green dots and orange triangles represent Arabidopsis immune- and *B. cinerea* virulence-GCNs, respectively. Blue and red lines (edges) represent the positive and negative Spearman's rank correlation coefficients between GCN pairs, respectively. The thickness of line signifies the correlational strength.

343

344 To test the direct interaction between individual genes from two organisms, we conducted  
345 Arabidopsis-*B. cinerea* GCNs using co-transcriptome data under each host genotype. We  
346 calculated Spearman's rank correlation coefficients among 23,898 Arabidopsis transcripts and  
347 9,284 *B. cinerea* transcripts. This approach allowed us to identify three cross-kingdom GCNs



348 (CKGCNs) under Arabidopsis WT and JA- or SA-compromised two mutants (Supplemental  
349 Figure 7, Supplemental Table 5, and Supplemental Data Set 8). Under Arabidopsis WT, a total  
350 of 54 hub genes were identified and half of them from the *B. cinerea* genome. Furthermore,  
351 CKGCNs contain a majority of genes in the BOT GCN and a small proportion of genes in the  
352 vesicle/virulence GCN (Supplemental Figure 8G, 8F, and 8H). For plants, CKGCNs contain a  
353 majority of genes from Arabidopsis Defense/camalexin GCN (Supplemental Figure 8C, 8D, and  
354 8F). These CKGCNs also contain genes associated with extensive host defense responses, i.e.,  
355 genes encoding membrane-localized leucine-rich repeat receptor kinases (LRR-RKs), stress  
356 signal sensing and transduction, tryptophan-derived phytoalexin production, regulation of cell  
357 death, cell wall integrity, nutrition transporters, etc. (Supplemental Data Set 8). CKGCNs varied  
358 their topological structure and gene content across the three Arabidopsis genotypes  
359 (Supplemental Figure 7). Shifting of core gene set and hub genes across host genotypes indicate  
360 the important role of virulence and immunity provided by individual genes depending on the  
361 host-pathogen interaction.

## 362 **DISCUSSION**

363 In recent decades, improved understanding of the molecular basis of plant-pathogen dynamics  
364 has facilitated breeding strategies for disease resistance in a variety of crop species. However,  
365 breeding for disease resistance remains difficult for crops susceptible to pathogens that harbor  
366 diverse polygenic virulence strategies targeting multiple layers and components of the plant  
367 innate immune system (Corwin and Kliebenstein, 2017). In this study, we investigated the  
368 transcriptome profiles at an early infection stage both within *B. cinerea* and across the interaction  
369 within the Arabidopsis-*B. cinerea* pathosystem. This showed that the transcriptional virulence  
370 strategy employed by *B. cinerea* is dependent both on fungal genotype and the functional  
371 response of the host plant's immune system. We identified a batch of early *B. cinerea* transcripts  
372 associated with later lesion development and several pathogen GCNs responsible for mediating  
373 virulence in *B. cinerea*, including a potential specialized metabolic pathway of cyclic peptide  
374 virulence factor. Lastly, we constructed a co-transcriptome network that revealed known and  
375 novel fungal virulence components coordinated expressed with plant host GCNs during  
376 infection.

## 377 **Secondary Metabolites Mediate Plant and Fungus Transcriptomic Interactions During** 378 **Infection**

379 Necrotrophic pathogen *B. cinerea* has evolved an arsenal of virulence strategies to establish  
380 colonization and enhance infection within the plant host, including production of secondary  
381 metabolites. The co-transcriptome approach shows that the expression of fungal specialized  
382 pathways early in infection correlates with later lesion development (Supplemental Table 3).  
383 Three secondary metabolite GCNs are clustered within the fungal genome and two of them  
384 identified with pathway-specific transcription factors (Figure 5, Supplemental Figure 4 and  
385 Supplemental Data Set 7). Further, the expression of these pathways displayed a large range of  
386 phenotypic variation across the isolates (Figure 5G and Supplemental Data Set 1). However, the  
387 topology and memberships of GCNs for the three pathways are largely insensitive to variation in  
388 host immunity. Robustness to host immunity suggests that these GCNs are somehow insulated  
389 from the host's immune response, possibly to protect toxin production from a host counter-  
390 attack. The co-transcriptome approach showed the ability to identify known and novel secondary  
391 metabolic pathways that mediate plant host and fungal pathogen interaction.

392 Importantly, dual interaction network indicated pathogen-GCNs responsible for fungal secondary  
393 metabolites production link to specific plant host-GCNs (Figure 7). Specifically, the co-  
394 transcriptome approach revealed that *B. cinerea* GCNs responsible for secondary metabolite  
395 production are positively associated with plant immune responses and negatively associated with  
396 primary plant metabolism (Figure 7, Supplemental Table 3 and 4). For example, the BOT GCN  
397 shows a strong positive correlation with the Arabidopsis defense/camalexin GCN, suggesting  
398 that BOT production may directly induce the host's defense system. Concurrently, the BOT  
399 GCN is negatively linked to the plant's PSI GCN, suggesting that BOT may repress the plant's  
400 photosynthetic potential. Further work is needed to test the direction of causality within the dual  
401 interaction network as it is possible that the host's defense/camalexin network is responding to  
402 the PSI alteration, or vice versa. Collectively, these results strongly implicate the ability of  
403 secondary metabolites biosynthesis to mediate the interactions between pathogen virulence and  
404 plant host immunity at the transcriptomic level. The co-transcriptome approach showed the  
405 potential to enable us to form new hypotheses about how this linkage may occur.

## 406 **Fungal Virulence Components Correlated with Plant Immune Response**



407 In addition to secondary metabolite biosynthesis, the co-transcriptome identified a number of key  
408 virulence mechanisms that could be mapped to the two species interaction. One key GCN is  
409 enriched for genes involved in exocytosis associated regulation (Figure 4-exocytosis regulation  
410 and Supplemental Data Set 7). The exocytosis complex is responsible for delivery of secondary  
411 metabolites and proteins to the extra-cellular space and plasma membrane in fungi (Colombo et  
412 al., 2014; Rodrigues et al., 2015). Additionally, we found many *B. cinerea* genes associated  
413 with secretory vesicles within the membrane/vesicle virulence GCN that likely serve a similar  
414 function during infection (Figure 4-Vesicle/virulence and Supplemental Data Set 7). These  
415 GCNs also provide support for the role of exocytosis-based spatial segregation of different  
416 materials during fungal hyphae growth *in planta* (Samuel et al., 2015). The dual interaction  
417 network suggests that the exocytosis regulation and membrane/vesicle virulence GCNs are  
418 differentially linked to the Arabidopsis defense/camalexin GCN, indicating varied connections  
419 between fungal secretory pathways and plant immune responses (Figure 7 and Supplemental  
420 Table 3 and 4). Another conserved GCN in the *B. cinerea* species is associated with copper  
421 uptake and transport (Figure 4-Copper transport, Supplemental Figure 2, 4, 5, and Supplemental  
422 Data Set 7). Although copper is essential for *B. cinerea* penetration and redox status regulation  
423 within plant tissues, further work is required to decipher the precise molecular mechanism  
424 involved in acquisition and detoxification of copper. Thus, the co-transcriptome approach can  
425 identify both known and unknown mechanisms and links within the host-pathogen interaction.

## 426 **Fungal Virulence Transcriptomic Responses Are Partly Shaped by Host Immunity**

427 It is largely unknown how plant host immunity contributes to the transcriptomic behavior of the  
428 fungus during infection. Even less is known about the role of genetic variation in the pathogen in  
429 responding to, or coping with, the inputs coming from the host immune system. In the current  
430 study, we found that the host immune system was able to alter the expression of only some of  
431 pathogen transcripts and GCNs (Figure 2, Figure 6, Supplemental Figure 6, and Supplemental  
432 Data 5). For example, fungal GCNs associated with membrane/vesicle virulence and fungal  
433 growth shifted drastically between the WT and *coil-1* or *npr1-1* Arabidopsis genotypes (Figure  
434 6). In addition, some GCNs only appeared in specific backgrounds. For example, those linked to  
435 siderophores and a polyketide production were only identified during infection of the JA-  
436 compromised Arabidopsis mutant (Supplemental Figure 6J and 6L). However, other fungal  
437 GCNs, like those involved in secondary metabolism, were largely insensitive to variation in the

438 host immunity (Supplemental Figure 2, 4, 5, Supplemental Table 1, and Supplemental Data Set  
439 7). Critically, the gene membership of these GCNs is largely stable across the collection of  
440 pathogen isolates, even while their expression level across the *B. cinerea* isolates is highly  
441 polymorphic (Figure 5 and Supplemental Figure 6). This suggests that natural variation in the  
442 host immunity and pathogen shapes how the co-transcriptome responds to host's immune  
443 system. Further, the natural variation in the pathogen may be focused around these functional  
444 GCNs.

#### 445 **Plant Disease Development Can Be Predicted by Early Transcriptome Data**

446 Plant disease development is an abstract phenomenon that is the result of a wide set of spatio-  
447 temporal biological processes encoded by two interplaying species under a specific environment.  
448 In current study, we used late stage lesion area as a quantitative indicator of *B. cinerea* virulence.  
449 We have previously shown that early Arabidopsis transcriptomic response could be linked to  
450 later lesion development (Zhang et al., 2017). Here, our findings suggest that the late-stage  
451 disease development of a *B. cinerea* infection is determined during the first few hours of  
452 infection by the interaction of plant immune and fungal virulence responses. It was possible to  
453 create a link between early transcripts' accumulation and late disease development using solely  
454 the *B. cinerea* transcriptome (Figure 1 and Supplemental Data Set 6). This could be done using  
455 either individual pathogen genes, GCNs, or more simply the total fraction of transcripts from the  
456 pathogen. As the transcriptomic data were from plant leaf tissue only 16 HPI, there is not a  
457 significant amount of pathogen biomass and this is more likely an indicator of transcriptional  
458 activity in the pathogen during infection. It is possible to develop these methods as possible  
459 biomarkers for likely fungal pathogen caused disease progression.

#### 460 **CONCLUSION**

461 By analyzing an early stage co-transcriptome of a *B. cinerea* population infection on  
462 Arabidopsis, we identified a number of *B. cinerea* GCNs that contained a variety of virulence-  
463 associated gene modules with different biological functions. The characterization of these GCNs  
464 simultaneously identified mechanisms known to enhance *B. cinerea* virulence and implicated  
465 several novel mechanisms not previously described in the Arabidopsis-*B. cinerea* pathosystem.  
466 In addition, we characterized a plant-fungus co-transcriptome network and identified the  
467 potential interaction between fungal pathogen- and plant host-GCNs. These results shed lights on

468 the biological mechanisms driving quantitative pathogen virulence in *B. cinerea* and their  
469 potential targets in the plant innate immune system. This holistic understanding of the plant-  
470 pathogen interaction provides an opportunity to better understand and effectively combat crop  
471 diseases in agricultural and forest systems.

## 472 **METHODS**

### 473 **Collection and Maintenance *B. cinerea* Isolates**

474 A collection of 96 *B. cinerea* isolates were selected in this study based on their phenotypic and  
475 genotypic diversity (Denby et al., 2004; Rowe and Kliebenstein, 2007; Corwin, Subedy et al.,  
476 2016; Zhang et al., 2016; Zhang et al., 2017). This *B. cinerea* collection was sampled from a  
477 large variety of different host origins and contained a set of international isolates obtained from  
478 labs across the world, including the well-studied B05.10 isolate. A majority of isolates are  
479 natural isolates that isolated from California and can infect a wide range of crops. Isolates are  
480 maintained in -80 °C freezer stocks as spores in 20% glycerol and were grown on fresh potato  
481 dextrose agar (PDA) 10 days prior to infection.

### 482 **Plant Materials and Growth Conditions**

483 The Arabidopsis accession Columbia-0 (Col-0) was the wildtype background of all Arabidopsis  
484 mutants used in this study. The three Arabidopsis genotypes used in this study included the WT  
485 and two well-characterized immunodeficient mutants, *coil-1* and *npr1-1*, that abolish the major  
486 JA- or SA-defense perception pathways, respectively (Cao et al., 1997; Xie et al., 1998; Xu, L.  
487 et al., 2002; Pieterse and Van Loon, 2004). All plants were grown as described previously  
488 (Zhang et al., 2017). Two independent randomized complete block-designed experiments were  
489 conducted and a total of 90 plants per genotype were grown in 30 flats for each experiment.  
490 Approximately 5 - 6 fully developed leaves were harvested from the five-week old plants and  
491 placed on 1% phytoagar in large plastic flats prior to *B. cinerea* infection.

### 492 **Inoculation and Sampling**

493 We infected all 96 isolates onto each of the three Arabidopsis genotypes in a random design with  
494 6-fold replication across the two independent experiments. A total of twelve infected leaves per

495 isolate/genotype pair were generated. For inoculation, all *B. cinerea* isolates were cultured and  
496 inoculated on three Arabidopsis genotypes as described previously (Denby et al., 2004; Corwin,  
497 Copeland et al., 2016; Zhang et al., 2017). Briefly, frozen glycerol stocks of isolate spores were  
498 first used for inoculation on a few slices of canned peaches in petri plates. Spores were collected  
499 from one-week-old sporulating peach slices. The spore solution was filtered and the spore pellet  
500 was re-suspended in sterilized 0.5x organic grape juice (Santa Cruz Organics, Pescadero, CA).  
501 Spore concentrations were determined using a hemacytometer and suspensions were diluted to  
502 10 spores/ $\mu$ L. Detached leaf assays were used for a high-throughput analysis of *B. cinerea*  
503 infection, which has been shown to be consistent with whole plant assay (Govrin and Levine,  
504 2000; Mengiste et al., 2003; Denby et al., 2004; Sharma et al., 2005; Windram et al., 2012).  
505 Five-week old leaves were inoculated with 4  $\mu$ L of the spore solution. The infected leaf tissues  
506 were incubated on 1% phytoagar flats with a humidity dome at room temperature. The  
507 inoculation was conducted in a randomized complete block design across the six planting blocks.  
508 All inoculations were conducted within one hour of dawn and the light period of the leaves was  
509 maintained. Two blocks were harvest at 16 hours post-inoculation (HPI) for RNA-Seq analysis.  
510 The remaining four blocks were incubated at room temperature until 72 HPI when they were  
511 digitally imaged for lesion size and harvested for chemical analysis as described previously  
512 (Zhang et al., 2017).

### 513 **RNA-Seq Library Preparation, Sequencing, Mapping and Statistical Analysis**

514 Two *B. cinerea* infected leaf tissues of the six blocks were sampled at 16 HPI for transcriptome  
515 analysis, which resulted in a total of 1,052 mRNA libraries for Illumina HiSeq sequencing.  
516 RNA-Seq libraries were prepared according to a previous method (Kumar et al., 2012) with  
517 minor modifications (Zhang et al., 2017). Briefly, infected leaves were immediately frozen in  
518 liquid nitrogen and stored at -80 °C until processing. RNA extraction was conducted by re-  
519 freezing samples in liquid nitrogen and homogenizing by rapid agitation in a bead beater  
520 followed by direct mRNA isolation using the Dynabeads oligo-dT kit. First and second strand  
521 cDNA was produced from the mRNA using an Invitrogen Superscript III kit. The resulting  
522 cDNA was fragmented, end-repaired, A-tailed and barcoded as previously described. Adapter-  
523 ligated fragments were enriched by PCR and size-selected for a mean of 300 base pair (bp) prior  
524 to sequencing. Barcoded libraries were pooled in batches of 96 and submitted for a single-end,

525 50 bp sequencing on a single lane per pool using the Illumina HiSeq 2500 platform at the UC  
526 Davis Genome Center (DNA Technologies Core, Davis, CA).

## 527 **Bioinformatics and Statistical Analysis**

528 Fastq files from individual HiSeq lanes were separated by adapter index into individual RNA-  
529 Seq library samples. The quality of individual libraries was estimated for overall read quality and  
530 over-represented sequences using FastQC software (Version 0.11.3,  
531 [www.bioinformatics.babraham.ac.uk/projects/](http://www.bioinformatics.babraham.ac.uk/projects/)). We conducted downstream bioinformatic  
532 analysis, like reads mapping, normalization and nbGLM model analysis, using a custom script  
533 from the Octopus R package (<https://github.com/WeiZhang317/octopus>). The mapping of  
534 processed reads against *Arabidopsis* and *B. cinerea* reference genomes was conducted by Bowtie  
535 1 (V.1.1.2, <http://sourceforge.net/projects/bowtie-bio/files/bowtie/1.1.2/>) using minimum  
536 phred33 quality scores (Langmead et al., 2009). The first 10 bp of reads was trimmed to remove  
537 low quality bases using the fastx toolkit  
538 ([http://hannonlab.cshl.edu/fastx\\_toolkit/commandline.html](http://hannonlab.cshl.edu/fastx_toolkit/commandline.html)). Total reads for each library were  
539 firstly mapped against the *Arabidopsis* TAIR10.25 cDNA reference genome. The remaining un-  
540 mapped reads were then aligned against *B. cinerea* B 05.10 isolate cDNA reference genome  
541 (Lamesch et al., 2010; Lamesch et al., 2012; Krishnakumar et al., 2015; Van Kan et al., 2017)  
542 and the gene counts for both species were pulled from the resulting SAM files (Li et al., 2009).

543 For pathogen gene expression analysis, we first filtered genes with either more than 30 gene  
544 counts in one isolate or 300 gene counts across 96 isolates. We normalized *B. cinerea* gene  
545 counts data set using the trimmed mean of M-values method (TMM) from the EdgeR package  
546 (V3.12) (Robinson and Smyth, 2008; Bullard et al., 2010; Robinson and Oshlack, 2010). We  
547 then ran the following generalized linear model (GLM) with a negative binomial link function  
548 from the MASS package for all transcripts using the following equation (Venables and Ripley,  
549 2002):

$$550 Y_{\text{egai}} = E_e + E_e(\text{Gf}_g) + E_e(\text{Gf}_g(\text{Af}_a)) + I_i + H_h + H_h * I_i$$

551 where the main categorical effects E, I, and H are denoted as experiment, isolate genotype, and  
552 plant host genotype, respectively. Nested effects of the growing flat (Gf) within the experimental  
553 replicates and agar flat (Af) nested within growing flat are also accounted for within the model.

554 Model corrected means and standard errors for each transcript were determined for each  
555 isolate/plant genotype pair using the lsmeans package (Russell V. Lenth, 2016). Raw *P*-values  
556 for F- and Chi Square-test were determined using Type II sums of squares using *car* package  
557 (Fox and Weisberg, 2011). *P*-values were corrected for multiple testing using a false discovery  
558 rate correction (Benjamini and Yekutieli, 2001). Broad-sense heritability ( $H^2$ ) of individual  
559 transcripts was estimated as the proportion of variance attributed to *B. cinerea* genotype,  
560 Arabidopsis genotype, or their interaction effects.

### 561 ***B. cinerea* Gene Co-expression Network Construction**

562 To obtain a representative subset of *B. cinerea* genes co-expressed under *in planta* conditions,  
563 we generated gene co-expression networks (GCNs) among genes in the *B. cinerea* transcriptome.  
564 GCNs were generated using the model-corrected means of 9,284 *B. cinerea* transcripts from  
565 individual isolate infection across three Arabidopsis genotypes. Only genes with average or  
566 medium expression greater than zero across all samples were considered. This preselection  
567 process kept 6,372 genes and those with negative expression values were adjusted to set  
568 expression at zero before network construction. Spearman's rank correlation coefficients for each  
569 gene pair was calculated using the *cor* function in R. Three gene-for-gene correlation similarity  
570 matrixes were generated independently for each of the three Arabidopsis genotypes. Considering  
571 the cutoff for gene-pair correlation usually generates biases of GCN structure and the candidate  
572 gene hit, we utilized several cutoff threshold values at 0.75, 0.8, 0.85, and 0.9 to filter the gene  
573 set. Comparing the structure and content of GCNs among those GCN sets using filtered gene set  
574 as input, we selected the correlation threshold at 0.8. A total of 600, 700 and 494 *B. cinerea*  
575 candidate genes passed the criterion under Arabidopsis WT, mutants *coi1-1* and *npr1-1*,  
576 respectively. To obtain a representative subset of *B. cinerea* gene candidates across three host  
577 genotypes, we selected gene candidates that presented across the above three gene subsets. This  
578 process generated a gene set with 323 *B. cinerea* candidate genes that were common to each of  
579 the plant genotype backgrounds and had at least 0.8 significant correlations. Using this gene set  
580 as kernel, we extended gene candidate sets under each Arabidopsis genotype. The expanded *B.*  
581 *cinerea* gene candidate set under individual Arabidopsis genotypes was further used as input for  
582 gene co-expression network construction.



583 GCNs were visualized using Cytoscape V3.2.1 (Java version:1.8.0\_60) (Shannon et al., 2003).  
584 The nodes and edges within each network represent the *B. cinerea* genes and the Spearman's  
585 rank correlations between each gene pair. The importance of a given node within each network  
586 was determined by common network analysis indices, such as connectivity (degree) and  
587 betweenness. Nodes with higher connectivity and betweenness were considered as hub and  
588 bottleneck genes, respectively, and the biological functions of each network were determined by  
589 the GO terms of hub and bottle neck genes using Blast2GO.

### 590 **Dual Interaction Network Construction**

591 To construct a cross-kingdom, dual interaction network of plant-pathogen GCNs, we performed  
592 principle component analysis on individual GCNs within each species to obtain eigengene  
593 vectors describing the expression of the entire gene network as previously described (Zhang and  
594 Horvath, 2005; Langfelder and Horvath, 2008; Okada et al., 2016). From these eigengene  
595 vectors, we calculated the Spearman's rank correlation coefficient between the first eigengene  
596 vectors for each network. The resulting similarity matrices were used as input to construct the  
597 interaction network and Cytoscape was used to visualize the resulting network.

### 598 **Cross-kingdom Arabidopsis-*B. cinerea* Gene Co-expression Network Construction**

599 We used model-corrected means of transcripts from three Arabidopsis host genotypes and 96 *B.*  
600 *cinerea* isolates to construct the cross-kingdom Arabidopsis-*B. cinerea* GCNs. Model-corrected  
601 means of 23,959 Arabidopsis transcripts and 6,372 *B. cinerea* transcripts derived from two  
602 negative binomial linked generalized linear models were served as input data sets (Zhang et al.,  
603 2017). Spearman's rank correlation coefficient was calculated between genes from Arabidopsis  
604 and *B. cinerea* data sets. The gene pairs with positive correlations greater than 0.74 under each  
605 Arabidopsis genotype were considered to construct cross-kingdom GCNs.

### 606 **Gene Ontology Analysis**

607 GO analysis was conducted for several *B. cinerea* gene sets that were identified with high  
608 heritability, correlated with lesion size, and condensed in network analysis. We first converted  
609 sequences of these *B. cinerea* genes into fasta files using Biostrings and seqRFLP packages in R  
610 (Ding and Zhang, 2012; Pages et al., 2017). The functional annotation of genes was obtained by



611 blasting the sequences against the NCBI database using Blast2GO to obtain putative GO  
612 annotations (Conesa et al., 2005; Gotz et al., 2008). The GO terms were compared to the  
613 official GO annotation from the *B. cinerea* database  
614 ([http://fungi.ensembl.org/Botrytis\\_cinerea/Info/Index](http://fungi.ensembl.org/Botrytis_cinerea/Info/Index)) and those obtained by Blast2GO analysis.  
615 The official gene annotations for host genes was retrieved from TAIR10.25  
616 (<https://apps.araport.org/thalemine/bag.do?subtab=upload>).

## 617 **Statistical Analysis of Network Components**

618 All the analyses were conducted using R V3.2.1 statistical environment (R Core Team, 2014). To  
619 investigate how secondary metabolite induction in *B. cinerea* contributes to disease  
620 development, we conducted a multi-factor ANOVA on *B. cinerea* three secondary metabolic  
621 pathways upon impacts on host genotypes. The three secondary metabolic pathways included the  
622 biosynthetic pathways of two well-known secondary metabolites, BOT and BOA, and a cyclic  
623 peptide biosynthetic pathway predicted in this study. We calculated the z-scores for all  
624 transcripts involved in BOT pathway, the BOA, and the putative cyclic peptide pathway for each  
625 isolate/plant genotype pair. The multi-factor ANOVA model for lesion area was:

$$626 \quad y_{\text{Lesion}} = \mu + T * A * C * G_h + \varepsilon.$$

627 where T, A, C, and  $G_h$  stand for BOT, BOA, Cyclic peptide, and host genotype, respectively.

628 In addition, we used multi-factor ANOVA models to investigate interactions between GCNs  
629 within species for impacts upon host genotypes. The ANOVA models contain all GCNs within a  
630 species. The first eigengene vector derived from principal component analysis on each network  
631 was used in ANOVA models.

632 The ANOVA model for individual *B. cinerea* GCNs was:

$$633 \quad y_{\text{BcNet}_i} = \mu + D * P * C * \text{PSI} * G_h + \varepsilon$$

634 where D, P, C, PSI, and  $G_h$  stand for Arabidopsis Defense/Camalexin GCN, Arabidopsis Plastid  
635 GCN, Arabidopsis Cell/Division GCN, Arabidopsis PSI GCN, and Host genotypes, respectively.  
636  $G_h$  stands for HostGenotype, respectively. BcNet<sub>i</sub> represents one of the ten *B. cinerea* GCNs  
637 identified in this study.

638 The ANOVA model for individual Arabidopsis GCNs was:

$$639 y_{AtNeti} = \mu + \sum BcNeti + G_h + \varepsilon$$

640 where  $\sum BcNeti$  represents the summation of each of the ten *B. cinerea* GCNs identified in this  
641 study: BcVesicle/Viru GCN, BcTSL/Growth GCN, BcBOA GCN, BcExocytoRegu GCN,  
642 BcCycPep GCN, BcCopperTran GCN, BcBOT GCN, BcPeptidase GCN, BcIPP GCN,  
643 BcPolyketide GCN, while  $G_h$  stands for Host genotypes. Interactions among the terms were not  
644 tested to avoid the potential for overfitting. AtNeti stands for one of the four Arabidopsis GCNs  
645 (e.g. AtDefense/Camalexin GCN, AtPlastid GCN, AtCell/Division GCN, AtPSI GCN). All  
646 multi-factor ANOVA models were optimized by trimming to just the terms with a significant *P*-  
647 value (*P*-value < 0.05).

#### 648 **Data Availability**

649 The datasets in this study are available in the following database: Bioproject PRJNA473829  
650 (<https://www.ncbi.nlm.nih.gov/bioproject/?term=PRJNA473829>). The computer scripts used in  
651 this study are available in GitHub (<https://github.com/WeiZhang317/octopus>).

#### 652 **Author contributions and Acknowledgement**

653 JAC, DJK conceived and designed the experiments. JAC, WZ, DC, JF and RE performed the  
654 experiments. WZ, SA, DEC and DJK analyzed the data. WZ, JAC, and DJK wrote the paper.

#### 655 **Funding**

656 Funding for this work was provided by the NSF award IOS 1339125 to DJK, the USDA National  
657 Institute of Food and Agriculture, Hatch project number CA-D-PLS-7033-H to DJK and by the  
658 Danish National Research Foundation (DNRF99) grant to DJK, the China Scholarship Council  
659 grant 20130624 to WZ.

#### 660 **Figure legends**

661 **Figure 1. Correlation between earlier estimated *B. cinerea* biomass and later lesion area.**

662 Model-corrected lesion area means were estimated using the linear model on the six replicates

663 data from three Arabidopsis genotypes at 72-hours post-infection with 96 *B. cinerea* isolates.  
664 Estimated biomass of *B. cinerea* was calculated using the linear model-corrected fraction of *B.*  
665 *cinerea* mapped reads against total mapped reads to Arabidopsis and *B. cinerea* reference  
666 genomes. RNA-Seq analysis was conducted at 16-hours post-infection for each pathosystem.  
667 Three Arabidopsis genotypes are wild-type Col-0 (purple dot), jasmonate insensitive mutant  
668 *coil-1* (green triangle), and salicylic acid insensitive mutant *npr1-1* (orange diamond). The 90%  
669 confidence ellipse intervals are plotted for each Arabidopsis genotype for references. Quadratic  
670 regression lines are: Col-0:  $y = -0.00059x^2 + 0.729x + 10.037$ ,  $P = 0.0016$ , adjusted  $R^2 = 0.1101$ ;  
671 *coil-1*:  $y = -0.117x^2 + 4.44x - 0.1585$ ,  $P = 3.914e-07$ , adjusted  $R^2 = 0.2562$ ; *npr1-1*:  $y = -$   
672  $0.0579x^2 + 2.26x + 1.673$ ,  $P = 0.0001$ , adjusted  $R^2 = 0.161$ .

673 **Figure 2. Transcriptomic responses of *B. cinerea* on Arabidopsis are controlled by genetic**  
674 **variation in pathogen population, host genotypes, and their interaction.** (A) Distribution of  
675 broad-sense heritability ( $H^2$ ) of *B. cinerea* transcripts contributed by genetic variation in the *B.*  
676 *cinerea*, Arabidopsis genotypes, and the interaction between pathogen and host. Violin plots  
677 illustrating the distribution of  $H^2$  for transcripts from 96 *B. cinerea* isolates infecting on  
678 Arabidopsis genotypes. Heritability is partitioned across the different sources, 96 pathogen  
679 genotypes = “Isolate”, plant genotypes Col-0, *coil-1* and *npr1-1* plant genotypes = “Host”, and  
680 the corresponding interaction. The transcriptomic analysis was conducted by sequencing mRNA  
681 extracted from *B. cinerea* infected Arabidopsis leaves at 16-hours post-infection. Red lines  
682 indicate the average broad-sense heritability values of lesion area caused by isolates, Arabidopsis  
683 genotypes, and their interaction. (B) to (E) Expression profiles of *B. cinerea* transcripts  
684 significantly influenced by host genotypes. The model-corrected means ( $\log_2$ ) for *B. cinerea*  
685 transcript were used for plotting. The Arabidopsis genotypes, wild-type Col-0 (purple),  
686 jasmonate insensitive mutant *coil-1* (green), and salicylic acid mutant *npr1-1* (orange), are  
687 shown on the x axis. *B. cinerea* transcripts are: (B) *Bcin01g03790.1*, class IV chitin synthase; (C)  
688 *Bcin02g02980.1*, Monooxygenase; (D) *Bcin10g02260.1*, NADH oxidoreductase; (E)  
689 *Bcin11g05200.1*, caffeine-induced death Cid2; (F) to (I) Expression profiles of *B. cinerea*  
690 transcripts significantly influenced by the interaction between pathogen and host genotypes. (F)  
691 *Bcin02g03810.1*, GTP cyclohydrolase; (G) *Bcin09g01190.1*, Tripeptidyl-peptidase 1; (H)  
692 *Bcin10g01130.1*, in secretory pathway; (I) *Bcin14g05090.1*, a transcription factor.

693 **Figure 3. Expression profiles of an endopolygalacturonase gene *Bcpgl* from diverse *B.***  
694 ***cinerea* isolates across *Arabidopsis* genotypes.** Rank plot shows the relationship of *Bcpgl*  
695 expression from 32 diverse *B. cinerea* isolates (right) across three *Arabidopsis* genotypes (x  
696 axis). Three *Arabidopsis* genotypes are wild-type Col-0 (purple dot), jasmonate insensitive  
697 mutant *coil-1* (green triangle), and salicylic acid mutant *npr1-1* (orange diamond). The model-  
698 corrected means ( $\log_2$ ) for the transcript of *Bcpgl* (*Bcin14g00850.1*) encoding an  
699 endopolygalacturonase gene are utilized for plotting. The transcript expression levels from the  
700 same isolate across three *Arabidopsis* genotypes are connected with a colored line. The names of  
701 32 isolates are represented with the same colored lines as induced *Bcpgl* expression levels.  
702 Black lines indicate the expression levels of *Bcpgl* are higher in *coil-1* and *npr1-1* than in Col-0.  
703 Red lines indicate the higher expression levels of *Bcpgl* in *coil-1* but lower in *npr1-1*. Blue lines  
704 indicate the highest expression levels of *Bcpgl* are in Col-0. Dark green lines indicate the higher  
705 expression levels of *Bcpgl* in *npr1-1* but lower in *coil-1*.

706 **Figure 4. Gene co-expression networks identified from *B. cinerea* transcriptomic responses**  
707 **to *Arabidopsis* wild-type Col-0 immunity.** Ten gene co-expression networks (GCNs) with  
708 more than five nodes were identified from 96 *B. cinerea* isolates infecting on *Arabidopsis* wild-  
709 type Col-0. The similarity matrix is computed using Spearman's rank correlation coefficient.  
710 Nodes with different colors represent *B. cinerea* genes condensed in GCNs with different  
711 biological functions. Edges represent the Spearman's rank correlation coefficients between gene  
712 pairs. Trans- and cis-GCNs means GCNs are regulated by trans- and cis-regulatory elements,  
713 respectively. GCNs were named after their biological functions, which were determined by hub  
714 and bottleneck genes within each network. GCNs are: vesicle/virulence (red), translation/growth  
715 (green), exocytosis regulation (pink), cyclic peptide (yellow), peptidase (gray), isopentenyl  
716 pyrophosphate (IPP, turquoise), polyketide (violet), botcinic acid (BOA, blue), copper transport  
717 (slate blue), botrydial (BOT, purple).

718 **Figure 5. Variation of transcripts accumulation for secondary metabolites production**  
719 **across diverse *B. cinerea* isolates.** Expression profiles of genes responsible for botrydial,  
720 botcinic acid, cyclic peptide production across 96 isolates under *Arabidopsis* wild-type Col-0 are  
721 shown. (A) Schematic shows the genomic locus of seven botrydial (BOT) biosynthesis genes  
722 clustered together. Exons are represented by gray boxes. Introns and intergenic regions are  
723 represented by the grey line. Seven BOT genes are: *BcBOT1*, *BcBOT3* and *BcBOT4*, encoding a

724 cytochrome P450 monooxygenase, respectively; *BcBOT2* encoding a sesquiterpene cyclase;  
725 *BcBOT5* encoding an acetyl transferase; *BcBOT6* encoding a Zn(II)2Cys6 transcription factor,  
726 *BcBOT7* encoding a dehydrogenase reductase. (B) BOT biosynthesis pathway in *B. cinerea*. (C)  
727 Bar plots compare expression variation of *BcBOT2* across 96 *B. cinerea* isolates in responding to  
728 Arabidopsis wild-type Col-0 immunity. The model-corrected means ( $\log_2$ ) of transcripts were  
729 used for plotting. (D) Scatter plot illustrates the positive correlations between lesion area and  
730 accumulation of *BcBOT2* transcript across the 96 isolates in response to varied Arabidopsis  
731 immunities. Model-corrected lesion area means were estimated for three Arabidopsis genotypes  
732 at 72-hours post-infection with 96 *B. cinerea* isolates. The three Arabidopsis genotypes are  
733 labeled next to the confidence ellipse curves: wild-type Col-0 (purple dot), jasmonate insensitive  
734 mutant *coi1-1* (green triangle), and salicylic acid mutant *npr1-1* (orange diamond). The 90%  
735 confidence ellipse intervals are plotted for each Arabidopsis genotype for reference. Linear  
736 regression lines: Col-0:  $y = 3.2532x + 4.4323$ ,  $P = 1.008e-10$ , Adjusted  $R^2 = 3.3537$ ; *coi1-1*:  $y =$   
737  $7.4802x + 10.3289$ ,  $P = 7.895e-15$ , adjusted  $R^2 = 0.4700$ ; *npr1-1*:  $y = 3.7086x + 7.3487$ ,  $P =$   
738  $2.425e-11$ , adjusted  $R^2 = 0.3726$ . (E) and (F) Bar plots compare expression variation of *BcBOA6*  
739 in botcinic acid (BOA) pathway and *Bcin01g11460*. in cyclic peptide pathway across 96 *B.*  
740 *cinerea* isolates in response to Arabidopsis wild-type Col-0 immunity. (G) Venn diagram  
741 illustrates the number of *B. cinerea* isolates with the ability to induce BOT, BOA, and cyclic  
742 peptide.

743 **Figure 6. Comparison of plasticity of *B. cinerea* gene co-expression network under varied**  
744 **host immunity.** *B. cinerea* gene co-expression networks (GCNs) of vesicle/virulence (red) and  
745 translation/growth (green) identified under three Arabidopsis genotypes are compared. Three  
746 Arabidopsis genotypes are wild-type Col-0, jasmonate insensitive mutant *coi1-1*, and salicylic  
747 acid mutant *npr1-1*. Nodes marked with red and green colors represent *B. cinerea* genes  
748 condensed in GCNs with different biological functions. The same node condensed in GCNs  
749 across three Arabidopsis genotypes was marked with same color. Nodes specifically condensed in  
750 GCNs under two mutants *coi1-1* and *npr1-1* background are marked with orange color. Edges  
751 represent the Spearman's rank correlation coefficients between gene pairs.

752 **Figure 7. A dual interaction network reveals links between Arabidopsis immunity and *B.***  
753 ***cinerea* virulence.** A dual interaction network was constructed using gene co-expression  
754 networks (GCNs) from Arabidopsis and *B. cinerea* co-transcriptome. The first eigenvectors were

755 derived from individual GCNs and used as input to calculate Spearman's rank correlation  
756 coefficient between GCN pairs. Green dots and orange triangles represent Arabidopsis  
757 immune- and *B. cinerea* virulence-GCNs, respectively. Blue and red lines (edges) represent the  
758 positive and negative Spearman's rank correlation coefficients between GCN pairs, respectively.  
759 The thickness of line signifies the correlational strength.

## 760 **Supplemental Data**

761 **Supplemental Figure 1. Expression profiles of an oxaloacetate hydrolase gene *Bcoah* from**  
762 **diverse *B. cinerea* isolates across Arabidopsis genotypes.** Rank plot shows the relationship o  
763 *Bcoah* expression from 32 diverse *B. cinerea* isolates (right) across three Arabidopsis genotypes  
764 (x axis). Three Arabidopsis genotypes are wild-type Col-0 (purple dot), jasmonate insensitive  
765 mutant *coi1-1* (green triangle), and salicylic acid mutant *npr1-1* (orange diamond). The model-  
766 corrected means ( $\log_2$ ) for the transcript of *Bcoah* (*Bcin12g01020.1*) encoding an oxaloacetate  
767 hydrolase gene are utilized for plotting. The transcript expression levels from the same isolate  
768 across three Arabidopsis genotypes are connected with a colored line. The names of 32 isolates  
769 are represented with the same colored lines as induced *Bcoah* expression levels. Black lines  
770 indicate the expression levels of *Bcoah* are higher in *coi1-1* and *npr1-1* than in Col-0. Red lines  
771 indicate the higher expression levels of *Bcoah* in *coi1-1* but lower in *npr1-1*. Blue lines indicate  
772 the highest expression levels of *Bcoah* are in Col-0. Dark green lines indicate the higher  
773 expression levels of *Bcoah* in *npr1-1* but lower in *coi1-1*.

774 **Supplemental Figure 2. Gene co-expression networks identified from *B. cinerea***  
775 **transcriptomic responses to Arabidopsis wild-type Col-0 immunity.** *B. cinerea* gene co-  
776 expression networks (GCNs) were identified from 96 *B. cinerea* isolates infecting on  
777 Arabidopsis wild-type Col-0. The similarity matrix is computed using Spearman's rank  
778 correlation coefficient. All co-expressed gene pairs with correlation greater than 0.85 were  
779 shown. Nodes with different colors represent *B. cinerea* genes condensed in GCNs with different  
780 biological functions. Edges represent the Spearman's rank correlation coefficients between gene  
781 pairs. GCNs were ordered as number of nodes within each network. GCNs were named after  
782 their biological functions, which were determined by hub and bottleneck genes within each  
783 network: vesicle/virulence (red), translation/growth (green), botcinic acid (BOA, blue),



784 exocytosis regulation (pink), cyclic peptide (yellow), copper transport (slate blue), botrydial  
785 (BOT, purple), peptidase (gray), isopentenyl pyrophosphate (IPP, turquoise), polyketide (violet).

786 **Supplemental Figure 3. Genomic location of *B. cinerea* gene co-expression networks.** The  
787 circle diagrams showed the genome-wide distribution of gene pairs identified by *B. cinerea* gene  
788 co-expression networks (GCNs) under Arabidopsis wild-type Col-0. (A) to (J) Genomic  
789 locations of gene pairs identified by GCNs: (A) Vesicle/virulence, (B) translation/growth, (C)  
790 botcinic acid (BOA), (D) exocytosis regulation, (E) cyclic peptide, (F) copper transport, (G)  
791 botrydial (BOT), (H) peptidase (gray), (I) isopentenyl pyrophosphate (IPP), (G) polyketide. The  
792 rings show 18 *B. cinerea* chromosomes on a Mb scale. Genomic locations of co-expressed gene  
793 pairs are connected by the colored lines.

794 **Supplemental Figure 4. Gene co-expression networks identified from *B. cinerea***  
795 **transcriptomic responses to Arabidopsis jasmonate-compromised immunity.** *B. cinerea*  
796 gene co-expression networks (GCNs) were identified from 96 *B. cinerea* isolates infecting on  
797 Arabidopsis jasmonate insensitive mutant *coi1-1*. The similarity matrix is computed using  
798 Spearman's rank correlation coefficient. All co-expressed gene pairs with correlation greater  
799 than 0.8 were shown. Nodes with different colors represent *B. cinerea* genes condensed in GCNs  
800 with different biological functions. Nodes were marked with same color as under Arabidopsis  
801 wild-type Col-0 background. Nodes specifically condensed in GCNs under Arabidopsis mutant  
802 *coi1-1* background are marked with orange color. Edges represent the Spearman's rank  
803 correlation coefficients between gene pairs. GCNs were ordered as number of nodes within each  
804 network. GCNs were named after their biological functions, which were determined by hub and  
805 bottleneck genes within each network: vesicle/virulence (red/orange), translation/growth  
806 (green/orange), botrydial/ isopentenyl pyrophosphate (BOT/IPP, blue/turquoise/orange), botcinic  
807 acid (BOA, blue), exocytosis regulation (pink), peptidase (gray/orange), copper transport (slate  
808 blue/orange), plant cell wall degradation (orange), cyclic peptide (yellow), peptidase II  
809 (red/orange), siderophores (orange), 26S proteasome regulated protein degradation (red/orange),  
810 sugar, ROS/NO stress (orange), ATP (orange), polyketide (violet/orange).

811 **Supplemental Figure 5. Gene co-expression networks identified from *B. cinerea***  
812 **transcriptomic responses to Arabidopsis salicylic acid-compromised immunity.** *B. cinerea*  
813 gene co-expression networks (GCNs) were identified from 96 *B. cinerea* isolates infecting on



814 Arabidopsis salicylic acid insensitive mutant *npr1-1*. The similarity matrix is computed using  
815 Spearman's rank correlation coefficient. All co-expressed gene pairs with correlation greater  
816 than 0.8 were shown. Nodes with different colors represent *B. cinerea* genes condensed in GCNs  
817 with different biological functions. Nodes were marked with same color as under Arabidopsis  
818 wild-type Col-0 background. Nodes specifically condensed in GCNs under Arabidopsis mutant  
819 *npr1-1* background are marked with orange color. Edges represent the Spearman's rank  
820 correlation coefficients between gene pairs. GCNs were ordered as number of nodes within each  
821 network. GCNs were named after their biological functions, which were determined by hub and  
822 bottleneck genes within each network: translation/growth (green/orange), vesicle/virulence  
823 (red/orange), peptidase (gray/orange), polyketide (violet/orange), botrydial/isopentenyl  
824 pyrophosphate (BOT/IPP, blue/turquoise/orange), botcinic acid (BOA, blue), exocytosis  
825 regulation (pink), copper transport (slate blue/orange), cyclic peptide (yellow), unknown (red),  
826 sugar (orange), peptidase II (red/orange).

827 **Supplemental Figure 6. Plasticity in expression profiles of genes identified by *B. cinerea***  
828 **gene co-expression networks under varied Arabidopsis immunities.** Violin plots of (A) to  
829 (O) show the expression profiles of *B. cinerea* genes in response to variation of Arabidopsis  
830 immunity. Genes shown are condensed in *B. cinerea* gene co-expression networks (GCNs). The  
831 model-corrected means ( $\log_2$ ) for *B. cinerea* transcript were used for plotting. The Arabidopsis  
832 genotypes, wild-type Col-0 (purple), jasmonate insensitive mutant *coil-1* (green), and salicylic  
833 acid mutant *npr1-1* (orange), are shown on the x axis.

834 **Supplemental Figure 7. Cross-kingdom Arabidopsis-*B. cinerea* gene co-expression**  
835 **networks.** Three Arabidopsis genotypes are wild-type Col-0, jasmonate insensitive mutant *coil-*  
836 *1*, and salicylic acid insensitive mutant *npr1-1*. Green nodes represent Arabidopsis genes.  
837 Orange, red and violet nodes represent *B. cinerea* genes. Nodes with red and violet colors are  
838 condensed in *B. cinerea* vesicle/virulence and BOT gene co-expression networks, respectively.  
839 The degree of a node is shown by the size of a node. Edges represent the Spearman's rank  
840 correlation coefficients between gene pairs.

841 **Supplemental Figure 8. Associations between gene co-expression networks identified from**  
842 **co- and single-transcriptome.** Venn diagrams highlights: (A) the overlap of plant (left) and  
843 pathogen (right) genes condensed in Arabidopsis-*B. cinerea* gene co-expression networks

844 (GCNs) across three Arabidopsis genotypes, (B) the overlap of plant genes in Arabidopsis-B.  
845 cinerea GCNs and Arabidopsis GCNs across three genotypes, (C) the overlap of pathogen genes  
846 in Arabidopsis-*B. cinerea* GCNs and *B. cinerea* GCNs across three genotypes.

847 **Supplemental Table 1. Topology traits of *B. cinerea in planta* gene co-expression networks.**

848 **Supplemental Table 2. ANOVA table of lesion area and *B. cinerea* pathways.** A mixed linear  
849 model was fitted to test lesion area and *B. cinerea* pathways responsible for botrydial (BOT),  
850 botcinic acid (BOA), and cyclic peptide (CycPep) produced under three Arabidopsis genotypes.  
851 The lesion area data used in the model were GLM corrected least square means induced by 96 *B.*  
852 *cinerea* isolates. Model-corrected means of transcripts from 96 *B. cinerea* isolates were z-scaled  
853 and used in ANOVA. Df is the degrees of freedom for a term within the model. SS is the Sum of  
854 Squares variation. MS is the Mean of Squared variation. F value is derived from the F statistic  
855 and *P*-value indicates the statistical significance for a given term within the model. Significance  
856 of differences are shown as  $P < 0.001$  '\*\*\*', 0.01 '\*\*' and 0.05 '\*'.

857 **Supplemental Table 3. ANOVA tables of *B. cinerea* gene co-expression networks. Mixed**  
858 **linear models were fitted to individual *B. cinerea* (Bc) gene co-expression networks (GCNs) and**  
859 **variation of host genotypes and Arabidopsis (At) GCNs. Variation was estimated among host**  
860 **genotypes and first eigenvectors from four individual Arabidopsis GCNs. Df is the degrees of**  
861 **freedom for a term within the model. SS is the Sum of Squares variation. MS is the Mean of**  
862 **Squared variation. F value is derived from the F statistic and *P*-value indicates the statistical**  
863 **significance for a given term within the model. Significance of difference are shown as  $P < 0.001$**   
864 **'\*\*\*', 0.01 '\*\*' and 0.05 '\*'.**

865 **Supplemental Table 4. ANOVA tables of Arabidopsis gene co-expression networks. Linear**  
866 **mixed models were fitted to individual Arabidopsis (At) gene co-expression networks (GCNs)**  
867 **and variation of host genotypes and ten *B. cinerea* (Bc) GCNs. Variation was estimated among**  
868 **host genotypes and first eigenvectors from individual *B. cinerea* GCNs. Df is the degrees of**  
869 **freedom for a term within the model. SS is the Sum of Squares variation. MS is the Mean of**  
870 **Squared variation. F value is derived from the F statistic and *P*-value indicates the statistical**  
871 **significance for a given term within the model. Significance of difference are shown as  $P < 0.001$**   
872 **'\*\*\*', 0.01 '\*\*' and 0.05 '\*'.**

- 873 **Supplemental Table 5. Topology traits of cross-kingdom *Arabidopsis-B. cinerea* gene co-**  
874 **expression networks.** Three *Arabidopsis* genotypes are wild-type Col-0, jasmonate insensitive  
875 mutant *coil-1*, and salicylic acid insensitive mutant *npr1-1*.
- 876 **Supplemental Data Set 1. Model-corrected means of *B. cinerea* transcripts.** A table of  
877 model-corrected least-square means of *B. cinerea* transcripts from 96 isolates infection on  
878 *Arabidopsis* wild-type Col-0, jasmonate insensitive mutant *coil-1*, and salicylic acid insensitive  
879 mutant *npr1-1*.
- 880 **Supplemental Data Set 2. Standard errors of *B. cinerea* transcripts.** A table of model-  
881 corrected standard errors of *B. cinerea* transcripts infection on *Arabidopsis* wild-type Col-0,  
882 jasmonate insensitive mutant *coil-1*, and salicylic acid insensitive mutant *npr1-1*.
- 883 **Supplemental Data Set 3. GLM deviance tables and broad-sense heritability of *B. cinerea***  
884 **transcripts.** Summary of deviance tables derived from generalized linear model and estimated  
885 broad-sense heritability ( $H^2$ ) for *B. cinerea* transcripts. All significance values are corrected by  
886 false discovery rate.
- 887 **Supplemental Data Set 4. Model-corrected means of estimated *B. cinerea* biomass.** *B.*  
888 *cinerea* biomass of 96 isolates infection on *Arabidopsis* genotypes was estimated using the  
889 fraction of uniquely mapped reads against B05.10 reference genome. Three *Arabidopsis*  
890 genotypes are wild-type Col-0, jasmonate insensitive mutant *coil-1*, and salicylic acid  
891 insensitive mutant *npr1-1*.
- 892 **Supplemental Data Set 5. Top 100 heritability of *B. cinerea* transcripts.** Broad-sense  
893 heritability ( $H^2$ ) of individual *B. cinerea* transcript contributed by pathogen, host and their  
894 interaction were estimated. Three *Arabidopsis* genotypes are wild-type Col-0, jasmonate  
895 insensitive mutant *coil-1*, and salicylic acid insensitive mutant *npr1-1*.
- 896 **Supplemental Data Set 6. Spearman's rank correlation between lesion area and *B. cinerea***  
897 **transcripts abundance.** A table of spearman's rank correlation coefficient between lesion area  
898 and *B. cinerea* transcripts accumulation across three *Arabidopsis* genotypes or under individual  
899 genotypes. Three *Arabidopsis* genotypes are wild-type Col-0, jasmonate insensitive mutant *coil-*  
900 *1*, and salicylic acid insensitive mutant *npr1-1*.

901 **Supplemental Data Set 7. Gene list of *B. cinerea* gene co-expression networks.** Tables of *B.*  
902 *cinerea* genes identified by *B. cinerea* gene co-expression networks (GCNs) during 96 isolates  
903 infection on Arabidopsis wild-type Col-0, jasmonate insensitive mutant *coi1-1*, and salicylic acid  
904 insensitive mutant *npr1-1*.

905 **Supplemental Data Set 8. Gene list of cross-kingdom Arabidopsis-*B. cinerea* gene co-**  
906 **expression networks.** Tables of Arabidopsis and *B. cinerea* genes identified by co-transcriptome  
907 gene co-expression networks (GCNs) during 96 isolates infection on Arabidopsis wild-type Col-  
908 0, jasmonate insensitive mutant *coi1-1*, and salicylic acid insensitive mutant *npr1-1*.

## 909 References

- 910 **Arbelet, D., Malfatti, P., Simond-Cote, E., Fontaine, T., Desquilbet, L., Expert, D., Kunz,**  
911 **C., and Soulie, M.C.** (2010). Disruption of the Bcchs3a chitin synthase gene in *Botrytis cinerea*  
912 is responsible for altered adhesion and overstimulation of host plant immunity. *Mol. Plant*  
913 *Microbe Interact.* **23**, 1324-1334, doi/10.1094/MPMI-02-10-0046.
- 914 **Ascari, J., Boaventura, M.A., Takahashi, J.A., Duran-Patron, R., Hernandez-Galan, R.,**  
915 **Macias-Sanchez, A.J., and Collado, I.G.** (2013). Phytotoxic activity and metabolism of  
916 *Botrytis cinerea* and structure-activity relationships of isocaryolane derivatives. *J. Nat. Prod.* **76**,  
917 1016-1024, doi/10.1021/np3009013.
- 918 **Atwell, S., Corwin, J.A., Soltis, N.E., Subedy, A., Denby, K.J., and Kliebenstein, D.J.**  
919 (2015). Whole genome resequencing of *Botrytis cinerea* isolates identifies high levels of  
920 standing diversity. *Front. Microbiol.* **6**, 996, doi/10.3389/fmicb.2015.00996.
- 921 **Bednarek, P., Pislewska-Bednarek, M., Svatos, A., Schneider, B., Doubsky, J., Mansurova,**  
922 **M., Humphry, M., Consonni, C., Panstruga, R., Sanchez-Vallet, A., Molina, A., and**  
923 **Schulze-Lefert, P.** (2009). A glucosinolate metabolism pathway in living plant cells mediates  
924 broad-spectrum antifungal defense. *Science* **323**, 101-106, doi/10.1126/science.1163732.
- 925 **Benjamini Yoav and Yekutieli Daniel** (2001). The Control of the False Discovery Rate in  
926 Multiple Testing under Dependency. **29**, 1165-1188, doi/10.1214/aos/1013699998.
- 927 **Benton, M.J.** (2009). The Red Queen and the Court Jester: species diversity and the role of  
928 biotic and abiotic factors through time. *Science* **323**, 728-732, doi/10.1126/science.1157719.
- 929 **Bergelson, J., Kreitman, M., Stahl, E.A., and Tian, D.** (2001). Evolutionary dynamics of plant  
930 R-genes. *Science* **292**, 2281-2285, doi/10.1126/science.1061337.
- 931 **Blanco-Ulate, B., Morales-Cruz, A., Amrine, K.C., Labavitch, J.M., Powell, A.L., and**  
932 **Cantu, D.** (2014). Genome-wide transcriptional profiling of *Botrytis cinerea* genes targeting  
933 plant cell walls during infections of different hosts. *Front. Plant. Sci.* **5**, 435,  
934 doi/10.3389/fpls.2014.00435.
- 935 **Brooks, D.M., Bender, C.L., and Kunkel, B.N.** (2005). The *Pseudomonas syringae* phytotoxin  
936 coronatine promotes virulence by overcoming salicylic acid-dependent defences in *Arabidopsis*  
937 *thaliana*. *Mol. Plant. Pathol.* **6**, 629-639, doi/10.1111/j.1364-3703.2005.00311.x.

- 938 **Bullard, J.H., Purdom, E., Hansen, K.D., and Dudoit, S.** (2010). Evaluation of statistical  
939 methods for normalization and differential expression in mRNA-Seq experiments. *BMC*  
940 *Bioinformatics* **11**, 94, doi/10.1186/1471-2105-11-94.
- 941 **Buttner, D. and He, S.Y.** (2009). Type III protein secretion in plant pathogenic bacteria. *Plant*  
942 *Physiol.* **150**, 1656-1664, doi/10.1104/pp.109.139089.
- 943 **Cantarel, B.L., Coutinho, P.M., Rancurel, C., Bernard, T., Lombard, V., and Henrissat, B.**  
944 (2009). The Carbohydrate-Active EnZymes database (CAZy): an expert resource for  
945 Glycogenomics. **37**, D233–D238, doi/10.1093/nar/gkn663.
- 946 **Cao, H., Glazebrook, J., Clarke, J.D., Volko, S., and Dong, X.** (1997). The Arabidopsis NPR1  
947 gene that controls systemic acquired resistance encodes a novel protein containing ankyrin  
948 repeats. *Cell* **88**, 57-63, doi/10.1016/S0092-8674(00)81858-9.
- 949 **Choquer, M., Fournier, E., Kunz, C., Levis, C., Pradier, J.M., Simon, A., and Viaud, M.**  
950 (2007). Botrytis cinerea virulence factors: new insights into a necrotrophic and polyphageous  
951 pathogen. *FEMS Microbiol. Lett.* **277**, 1-10, doi/10.1111/j.1574-6968.2007.00930.x.
- 952 **Clay, N.K., Adio, A.M., Denoux, C., Jander, G., and Ausubel, F.M.** (2009). Glucosinolate  
953 metabolites required for an Arabidopsis innate immune response. *Science* **323**, 95-101,  
954 doi/10.1126/science.1164627.
- 955 **Colmenares, A.J., Aleu, J., Duran-Patron, R., Collado, I.G., and Hernandez-Galan, R.**  
956 (2002). The putative role of botrydial and related metabolites in the infection mechanism of  
957 Botrytis cinerea. *J. Chem. Ecol.* **28**, 997-1005, doi/10.15209817830.
- 958 **Colombo, M., Raposo, G., and Thery, C.** (2014). Biogenesis, secretion, and intercellular  
959 interactions of exosomes and other extracellular vesicles. *Annu. Rev. Cell Dev. Biol.* **30**, 255-  
960 289, doi/10.1146/annurev-cellbio-101512-122326.
- 961 **Conesa, A., Gotz, S., Garcia-Gomez, J.M., Terol, J., Talon, M., and Robles, M.** (2005).  
962 Blast2GO: a universal tool for annotation, visualization and analysis in functional genomics  
963 research. *Bioinformatics* **21**, 3674-3676, doi/10.1093/bioinformatics/bti610.
- 964 **Corwin, J.A., Copeland, D., Feusier, J., Subedy, A., Eshbaugh, R., Palmer, C., Maloof, J.,  
965 and Kliebenstein, D.J.** (2016). The Quantitative Basis of the Arabidopsis Innate Immune  
966 System to Endemic Pathogens Depends on Pathogen Genetics. *PLoS Genet.* **12**, e1005789,  
967 doi/10.1371/journal.pgen.1005789.
- 968 **Corwin, J.A., Subedy, A., Eshbaugh, R., and Kliebenstein, D.J.** (2016). Expansive  
969 Phenotypic Landscape of Botrytis cinerea Shows Differential Contribution of Genetic Diversity  
970 and Plasticity. *Mol. Plant Microbe Interact.* **29**, 287-298, doi/10.1094/MPMI-09-15-0196-R.
- 971 **Corwin, J.A. and Kliebenstein, D.J.** (2017). Quantitative Resistance: More Than Just  
972 Perception of a Pathogen. *Plant Cell* **29**, 655-665, doi/10.1105/tpc.16.00915.
- 973 **Courtade, G., Wimmer, R., Røhr, ÅK., Preims, M., Felice, A.K.G., Dimarogona, M., Vaaje-  
974 Kolstad, G., Sørli, M., Sandgren, M., Ludwig, R., Eijsink, V.G.H., and Aachmann, F.L.**  
975 (2016). Interactions of a fungal lytic polysaccharide monooxygenase with  $\beta$ -glucan substrates  
976 and cellobiose dehydrogenase. **113**, 5922, doi/10.1073/pnas.1602566113.
- 977 **Couto, D. and Zipfel, C.** (2016). Regulation of pattern recognition receptor signalling in plants.  
978 *Nat. Rev. Immunol.* **16**, 537-552, doi/10.1038/nri.2016.77.



- 979 **Cui, H., Qiu, J., Zhou, Y., Bhandari, D.D., Zhao, C., Bautor, J., and Parker, J.E.** (2018).  
980 Antagonism of Transcription Factor MYC2 by EDS1/PAD4 Complexes Bolsters Salicylic Acid  
981 Defense in Arabidopsis Effector-Triggered Immunity. *Mol. Plant.* **11**, 1053-1066,  
982 doi/10.1016/j.molp.2018.05.007.
- 983 **Dalmais, B., Schumacher, J., Moraga, J., LE Pêcheur, P., Tudzynski, B., Collado, I.G., and**  
984 **Viaud, M.** (2011). The Botrytis cinerea phytotoxin botcinic acid requires two polyketide  
985 synthases for production and has a redundant role in virulence with botrydial. **12**, 564,  
986 doi/10.1111/j.1364-3703.2010.00692.x.
- 987 **Dangl, J.L. and Jones, J.D.** (2001). Plant pathogens and integrated defence responses to  
988 infection. *Nature* **411**, 826-833, doi/10.1038/35081161.
- 989 **Deighton, N., Muckenschnabel, I., Colmenares, A.J., Collado, I.G., and Williamson, B.**  
990 (2001). Botrydial is produced in plant tissues infected by Botrytis cinerea. *Phytochemistry* **57**,  
991 689-692, doi/10.1016/S0031-9422(01)00088-7.
- 992 **Denby, K.J., Kumar, P., and Kliebenstein, D.J.** (2004). Identification of Botrytis cinerea  
993 susceptibility loci in Arabidopsis thaliana. *Plant J.* **38**, 473-486, doi/10.1111/j.0960-  
994 7412.2004.02059.x.
- 995 **Ding Qiong and Zhang Jinlong** (2012). seqRFLP: Simulation and visualization of restriction  
996 enzyme cutting pattern from DNA sequences. **R package version 1.0.1.**, .
- 997 **Fordyce, R.F., Soltis, N.E., Caseys, C., Gwinner, R., Corwin, J.A., Atwell, S., Copeland, D.,**  
998 **Feusier, J., Subedy, A., Eshbaugh, R., and Kliebenstein, D.J.** (2018). Digital Imaging  
999 Combined with Genome-Wide Association Mapping Links Loci to Plant-Pathogen Interaction  
1000 Traits. *Plant Physiol.*, doi/10.1104/pp.18.00851.
- 1001 **Fox, J. and Weisberg, S.** (2011). An R Companion to Applied Regression, Second Edition ed.  
1002 (Sage, CA: Thousand Oaks).
- 1003 **Frerigmann, H., Pislewska-Bednarek, M., Sanchez-Vallet, A., Molina, A., Glawischnig, E.,**  
1004 **Gigolashvili, T., and Bednarek, P.** (2016). Regulation of Pathogen-Triggered Tryptophan  
1005 Metabolism in Arabidopsis thaliana by MYB Transcription Factors and Indole Glucosinolate  
1006 Conversion Products. *Mol. Plant.* **9**, 682-695, doi/10.1016/j.molp.2016.01.006.
- 1007 **Gerbi, C., Bata, J., Breton, A., and Prensier, G.** (1996). Glycoside and polysaccharide  
1008 hydrolase activity of the rumen anaerobic fungus *Caecomyces communis* (*Sphaeromonas*  
1009 *communis* SENSU ORPIN) at early and final stages of the developmental cycle. *Curr. Microbiol.*  
1010 **32**, 256-259, doi/10.1007/s002849900046.
- 1011 **Glazebrook, J.** (2005). Contrasting mechanisms of defense against biotrophic and necrotrophic  
1012 pathogens. *Annu. Rev. Phytopathol.* **43**, 205-227, doi/10.1146/annurev.phyto.43.040204.135923.
- 1013 **Gotz, S., Garcia-Gomez, J.M., Terol, J., Williams, T.D., Nagaraj, S.H., Nueda, M.J.,**  
1014 **Robles, M., Talon, M., Dopazo, J., and Conesa, A.** (2008). High-throughput functional  
1015 annotation and data mining with the Blast2GO suite. *Nucleic Acids Res.* **36**, 3420-3435,  
1016 doi/10.1093/nar/gkn176.
- 1017 **Govrin, E.M. and Levine, A.** (2000). The hypersensitive response facilitates plant infection by  
1018 the necrotrophic pathogen Botrytis cinerea. *Curr. Biol.* **10**, 751-757, doi/10.1016/S0960-  
1019 9822(00)00560-1.



- 1020 **Greenberg, J.T., Guo, A., Klessig, D.F., and Ausubel, F.M.** (1994). Programmed cell death in  
1021 plants: a pathogen-triggered response activated coordinately with multiple defense functions.  
1022 *Cell* **77**, 551-563, doi/10.1016/0092-8674(94)90217-8.
- 1023 **Igarashi, K., Uchihashi, T., Uchiyama, T., Sugimoto, H., Wada, M., Suzuki, K., Sakuda, S.,**  
1024 **Ando, T., Watanabe, T., and Samejima, M.** (2014). Two-way traffic of glycoside hydrolase  
1025 family 18 processive chitinases on crystalline chitin. *Nat. Commun.* **5**, 3975,  
1026 doi/10.1038/ncomms4975.
- 1027 **Ingo Morgenstern, Justin Powlowski, and Adrian Tsang** (2014). Fungal cellulose degradation  
1028 by oxidative enzymes: from dysfunctional GH61 family to powerful lytic polysaccharide  
1029 monooxygenase family. **13**, 471, doi/10.1093/bfpg/elu032.
- 1030 **Jones, J.D. and Dangl, J.L.** (2006). The plant immune system. *Nature* **444**, 323-329,  
1031 doi/10.1038/nature05286.
- 1032 **Kanzaki, H., Yoshida, K., Saitoh, H., Fujisaki, K., Hirabuchi, A., Alaux, L., Fournier, E.,**  
1033 **Tharreau, D., and Terauchi, R.** (2012). Arms race co-evolution of *Magnaporthe oryzae* AVR-  
1034 Pik and rice Pik genes driven by their physical interactions. *Plant J.* **72**, 894-907,  
1035 doi/10.1111/j.1365-313X.2012.05110.x.
- 1036 **Karasov, T.L., Kniskern, J.M., Gao, L., DeYoung, B.J., Ding, J., Dubiella, U., Lastra, R.O.,**  
1037 **Nallu, S., Roux, F., Innes, R.W., Barrett, L.G., Hudson, R.R., and Bergelson, J.** (2014). The  
1038 long-term maintenance of a resistance polymorphism through diffuse interactions. *Nature* **512**,  
1039 436-440, doi/10.1038/nature13439.
- 1040 **Kliebenstein, D.J., Rowe, H.C., and Denby, K.J.** (2005). Secondary metabolites influence  
1041 Arabidopsis/Botrytis interactions: variation in host production and pathogen sensitivity. *Plant J.*  
1042 **44**, 25-36, doi/10.1111/j.1365-313X.2005.02508.x.
- 1043 **Krishnakumar, V., Hanlon, M.R., Contrino, S., Ferlanti, E.S., Karamycheva, S., Kim, M.,**  
1044 **Rosen, B.D., Cheng, C.Y., Moreira, W., Mock, S.A., Stubbs, J., Sullivan, J.M., Krampis, K.,**  
1045 **Miller, J.R., Micklem, G., Vaughn, M., and Town, C.D.** (2015). Araport: the Arabidopsis  
1046 information portal. *Nucleic Acids Res.* **43**, 1003, doi/10.1093/nar/gku1200.
- 1047 **Kubicek, C.P., Starr, T.L., and Glass, N.L.** (2014). Plant cell wall-degrading enzymes and  
1048 their secretion in plant-pathogenic fungi. *Annu. Rev. Phytopathol.* **52**, 427-451,  
1049 doi/10.1146/annurev-phyto-102313-045831.
- 1050 **Kumar, R., Ichihashi, Y., Kimura, S., Chitwood, D.H., Headland, L.R., Peng, J., Maloof,**  
1051 **J.N., and Sinha, N.R.** (2012). A High-Throughput Method for Illumina RNA-Seq Library  
1052 Preparation. *Front. Plant. Sci.* **3**, 202, doi/10.3389/fpls.2012.00202.
- 1053 **Lamesch, P., Dreher, K., Swarbreck, D., Sasidharan, R., Reiser, L., and Huala, E.** (2010).  
1054 Using the Arabidopsis information resource (TAIR) to find information about Arabidopsis genes.  
1055 *Curr. Protoc. Bioinformatics* **Chapter 1**, Unit1.11, doi/10.1002/cpbi.36.
- 1056 **Lamesch, P., Berardini, T.Z., Li, D., Swarbreck, D., Wilks, C., Sasidharan, R., Muller, R.,**  
1057 **Dreher, K., Alexander, D.L., Garcia-Hernandez, M., Karthikeyan, A.S., Lee, C.H., Nelson,**  
1058 **W.D., Ploetz, L., Singh, S., Wensel, A., and Huala, E.** (2012). The Arabidopsis Information  
1059 Resource (TAIR): improved gene annotation and new tools. *Nucleic Acids Res.* **40**, 1202,  
1060 doi/10.1093/nar/gkr1090.

- 1061 **Langfelder, P. and Horvath, S.** (2008). WGCNA: an R package for weighted correlation  
1062 network analysis. *BMC Bioinformatics* **9**, 559, doi/10.1186/1471-2105-9-559.
- 1063 **Langmead, B., Trapnell, C., Pop, M., and Salzberg, S.L.** (2009). Ultrafast and memory-  
1064 efficient alignment of short DNA sequences to the human genome. *Genome Biol.* **10**, r25. Epub  
1065 2009 Mar 4, doi/10.1186/gb-2009-10-3-r25.
- 1066 **Lanver, D., Muller, A.N., Happel, P., Schweizer, G., Haas, F.B., Franitza, M., Pellegrin, C.,**  
1067 **Reissmann, S., Altmuller, J., Rensing, S.A., and Kahmann, R.** (2018). The Biotrophic  
1068 Development of *Ustilago maydis* Studied by RNA-Seq Analysis. *Plant Cell* **30**, 300-323,  
1069 doi/10.1105/tpc.17.00764.
- 1070 **Lee, H.J., Georgiadou, A., Walther, M., Nwakanma, D., Stewart, L.B., Levin, M., Otto,**  
1071 **T.D., Conway, D.J., Coin, L.J., and Cunnington, A.J.** (2018). Integrated pathogen load and  
1072 dual transcriptome analysis of systemic host-pathogen interactions in severe malaria. *Sci. Transl.*  
1073 *Med.* **10**, 10.1126/scitranslmed.aar3619, doi/10.1126/scitranslmed.aar3619.
- 1074 **Li, H., Handsaker, B., Wysoker, A., Fennell, T., Ruan, J., Homer, N., Marth, G., Abecasis,**  
1075 **G., Durbin, R., and 1000 Genome Project Data Processing Subgroup** (2009). The Sequence  
1076 Alignment/Map format and SAMtools. *Bioinformatics* **25**, 2078-2079,  
1077 doi/10.1093/bioinformatics/btp352.
- 1078 **Macheleidt, J., Mattern, D.J., Fischer, J., Netzker, T., Weber, J., Schroeckh, V., Valiante,**  
1079 **V., and Brakhage, A.A.** (2016). Regulation and Role of Fungal Secondary Metabolites. *Annu.*  
1080 *Rev. Genet.* **50**, 371-392, doi/10.1146/annurev-genet-120215-035203.
- 1081 **McClure, R.S., Overall, C.C., Hill, E.A., Song, H.S., Charania, M., Bernstein, H.C.,**  
1082 **McDermott, J.E., and Beliaev, A.S.** (2018). Species-specific transcriptomic network inference  
1083 of interspecies interactions. *ISME J.* **12**, 2011-2023, doi/10.1038/s41396-018-0145-6.
- 1084 **Mengiste, T., Chen, X., Salmeron, J., and Dietrich, R.** (2003). The BOTRYTIS  
1085 SUSCEPTIBLE1 gene encodes an R2R3MYB transcription factor protein that is required for  
1086 biotic and abiotic stress responses in *Arabidopsis*. *Plant Cell* **15**, 2551-2565,  
1087 doi/10.1105/tpc.014167.
- 1088 **Mengiste, T.** (2012). Plant immunity to necrotrophs. *Annu. Rev. Phytopathol.* **50**, 267-294,  
1089 doi/10.1146/annurev-phyto-081211-172955.
- 1090 **Mine, A., Seyfferth, C., Kracher, B., Berens, M.L., Becker, D., and Tsuda, K.** (2018). The  
1091 Defense Phytohormone Signaling Network Enables Rapid, High-Amplitude Transcriptional  
1092 Reprogramming during Effector-Triggered Immunity. *Plant Cell* **30**, 1199-1219,  
1093 doi/10.1105/tpc.17.00970.
- 1094 **Mittal, S. and Davis, K.R.** (1995). Role of the phytotoxin coronatine in the infection of  
1095 *Arabidopsis thaliana* by *Pseudomonas syringae* pv. tomato. *Mol. Plant Microbe Interact.* **8**, 165-  
1096 171.
- 1097 **Moraga, J., Dalmais, B., Izquierdo-Bueno, I., Aleu, J., Hanson, J.R., Hernandez-Galan, R.,**  
1098 **Viaud, M., and Collado, I.G.** (2016). Genetic and Molecular Basis of Botrydial Biosynthesis:  
1099 Connecting Cytochrome P450-Encoding Genes to Biosynthetic Intermediates. *ACS Chem. Biol.*  
1100 **11**, 2838-2846, doi/10.1021/acscchembio.6b00581.
- 1101 **Movahedi, S., Norey, C.G., Kay, J., and Heale, J.B.** (1991). Infection and pathogenesis of cash  
1102 crops by *Botrytis cinerea*: primary role of an aspartic proteinase. **306**, 213.

- 1103 **Musungu, B.M., Bhatnagar, D., Brown, R.L., Payne, G.A., OBrian, G., Fakhoury, A.M.,**  
1104 **and Geisler, M.** (2016). A Network Approach of Gene Co-expression in the Zea  
1105 mays/Aspergillus flavus Pathosystem to Map Host/Pathogen Interaction Pathways. *Front. Genet.*  
1106 *7*, 206, doi/10.3389/fgene.2016.00206.
- 1107 **Nelson, C.E., Attia, M.A., Rogowski, A., Morland, C., Brumer, H., and Gardner, J.G.**  
1108 (2017). Comprehensive functional characterization of the glycoside hydrolase family 3 enzymes  
1109 from *Cellvibrio japonicus* reveals unique metabolic roles in biomass saccharification. *Environ.*  
1110 *Microbiol.* **19**, 5025-5039, doi/10.1111/1462-2920.13959.
- 1111 **Nobori, T., Velasquez, A.C., Wu, J., Kvitko, B.H., Kremer, J.M., Wang, Y., He, S.Y., and**  
1112 **Tsuda, K.** (2018). Transcriptome landscape of a bacterial pathogen under plant immunity. *Proc.*  
1113 *Natl. Acad. Sci. U. S. A.* **115**, E3064, doi/10.1073/pnas.1800529115.
- 1114 **Okada, H., Ebhardt, H.A., Vonesch, S.C., Aebersold, R., and Hafen, E.** (2016). Proteome-  
1115 wide association studies identify biochemical modules associated with a wing-size phenotype in  
1116 *Drosophila melanogaster*. *Nat. Commun.* **7**, 12649, doi/10.1038/ncomms12649.
- 1117 **Pages, H., Aboyoun, P., Gentleman, R., and DebRoy, S.** (2017). Biostrings: String objects  
1118 representing biological sequences, and matching algorithms. **R package version 2.44.2.**, .
- 1119 **Pérez-Izquierdo, L., Morin, E., Maurice, J.P., Martin, F., Rincón, A., and Buée, M.** (2017).  
1120 A new promising phylogenetic marker to study the diversity of fungal communities: The  
1121 Glycoside Hydrolase 63 gene. **17**, e11, doi/10.1111/1755-0998.12678.
- 1122 **Pieterse, C.M. and Van Loon, L.C.** (2004). NPR1: the spider in the web of induced resistance  
1123 signaling pathways. *Curr. Opin. Plant Biol.* **7**, 456-464, doi/10.1016/j.pbi.2004.05.006.
- 1124 **Pinedo, C., Wang, C., Pradier, J., Dalmais, B., Choquer, M., Le Pêcheur, P., Morgant, G.,**  
1125 **Collado, I.G., Cane, D.E., and Viaud, M.** (2008). Sesquiterpene synthase from the botrydial  
1126 biosynthetic gene cluster of the phytopathogen *Botrytis cinerea*. **3**, 791, doi/10.1021/cb800225v.
- 1127 **Porquier, A., Morgant, G., Moraga, J., Dalmais, B., Luyten, I., Simon, A., Pradier, J.M.,**  
1128 **Amselem, J., Collado, I.G., and Viaud, M.** (2016). The botrydial biosynthetic gene cluster of  
1129 *Botrytis cinerea* displays a bipartite genomic structure and is positively regulated by the putative  
1130 Zn(II)2Cys6 transcription factor BcBot6. *Fungal Genet. Biol.* **96**, 33-46,  
1131 doi/10.1016/j.fgb.2016.10.003.
- 1132 **Poussereau, N., Creton, S., Billon-Grand, G., Rasclé, C., and Fevre, M.** (2001). Regulation of  
1133 *acp1*, encoding a non-aspartyl acid protease expressed during pathogenesis of *Sclerotinia*  
1134 *sclerotiorum*. *Microbiology* **147**, 717-726, doi/10.1099/00221287-147-3-717.
- 1135 **R Core Team** (2014). R: A Language and Environment for Statistical Computing. (Vienna,  
1136 Austria).
- 1137 **Robinson, M.D. and Smyth, G.K.** (2008). Small-sample estimation of negative binomial  
1138 dispersion, with applications to SAGE data. *Biostatistics* **9**, 321-332,  
1139 doi/10.1093/biostatistics/kxm030.
- 1140 **Robinson, M.D. and Oshlack, A.** (2010). A scaling normalization method for differential  
1141 expression analysis of RNA-seq data. *Genome Biol.* **11**, r25. Epub 2010 Mar 2, doi/10.1186/gb-  
1142 2010-11-3-r25.

- 1143 **Rodrigues, M.L., Godinho, R.M., Zamith-Miranda, D., and Nimrichter, L.** (2015). Traveling  
1144 into Outer Space: Unanswered Questions about Fungal Extracellular Vesicles. *PLoS Pathog.* **11**,  
1145 e1005240, doi/10.1371/journal.ppat.1005240.
- 1146 **Rossi, F.R., Garriz, A., Marina, M., Romero, F.M., Gonzalez, M.E., Collado, I.G., and**  
1147 **Pieckenstain, F.L.** (2011). The sesquiterpene botrydial produced by *Botrytis cinerea* induces the  
1148 hypersensitive response on plant tissues and its action is modulated by salicylic acid and  
1149 jasmonic acid signaling. *Mol. Plant Microbe Interact.* **24**, 888-896, doi/10.1094/MPMI-10-10-  
1150 0248.
- 1151 **Rowe, H.C. and Kliebenstein, D.J.** (2007). Elevated genetic variation within virulence-  
1152 associated *Botrytis cinerea* polygalacturonase loci. *Mol. Plant Microbe Interact.* **20**, 1126-1137,  
1153 doi/10.1094/MPMI-20-9-1126.
- 1154 **Russell V. Lenth** (2016). Least-Squares Means: The R Package lsmeans. **69**, 1-33,  
1155 doi/10.18637/jss.v069.i01.
- 1156 **Samuel, M., Bleackley, M., Anderson, M., and Mathivanan, S.** (2015). Extracellular vesicles  
1157 including exosomes in cross kingdom regulation: a viewpoint from plant-fungal interactions.  
1158 *Front. Plant. Sci.* **6**, 766, doi/10.3389/fpls.2015.00766.
- 1159 **Schumacher, J., Pradier, J.M., Simon, A., Traeger, S., Moraga, J., Collado, I.G., Viaud, M.,**  
1160 **and Tudzynski, B.** (2012). Natural variation in the VELVET gene *bcvel1* affects virulence and  
1161 light-dependent differentiation in *Botrytis cinerea*. *PLoS One* **7**, e47840,  
1162 doi/10.1371/journal.pone.0047840.
- 1163 **Schumacher, J., Simon, A., Cohrs, K.C., Traeger, S., Porquier, A., Dalmais, B., Viaud, M.,**  
1164 **and Tudzynski, B.** (2015). The VELVET Complex in the Gray Mold Fungus *Botrytis cinerea*:  
1165 Impact of *BcLAE1* on Differentiation, Secondary Metabolism, and Virulence. *Mol. Plant*  
1166 *Microbe Interact.* **28**, 659-674, doi/10.1094/MPMI-12-14-0411-R.
- 1167 **Shannon, P., Markiel, A., Ozier, O., Baliga, N.S., Wang, J.T., Ramage, D., Amin, N.,**  
1168 **Schwikowski, B., and Ideker, T.** (2003). Cytoscape: a software environment for integrated  
1169 models of biomolecular interaction networks. *Genome Res.* **13**, 2498-2504,  
1170 doi/10.1101/gr.1239303.
- 1171 **Sharma, H.C., Pampapathy, G., Dhillon, M.K., and Ridsdill-Smith, J.T.** (2005). Detached  
1172 leaf assay to screen for host plant resistance to *Helicoverpa armigera*. *J. Econ. Entomol.* **98**, 568-  
1173 576, doi/10.1603/0022-0493-98.2.568.
- 1174 **Siewers, V., Viaud, M., Jimenez-Teja, D., Collado, I.G., Gronover, C.S., Pradier, J.,**  
1175 **Tudzynski, B., and Tudzynski, P.** (2005). Functional analysis of the cytochrome P450  
1176 monooxygenase gene *bcbot1* of *Botrytis cinerea* indicates that botrydial is a strain-specific  
1177 virulence factor. **18**, 602, doi/10.1094/MPMI-18-0602.
- 1178 **Soltis, N.E., Atwell, S., Shi, G., Fordyce, R., Gwinner, R., Gao, D., Shafi, A., and**  
1179 **Kliebenstein, D.** (2018). Crop domestication and pathogen virulence: Interactions of tomato and  
1180 *Botrytis* genetic diversity. , doi/10.1101/255992.
- 1181 **Stefanato, F.L., Abou-Mansour, E., Buchala, A., Kretschmer, M., Mosbach, A., Hahn, M.,**  
1182 **Bochet, C.G., Metraux, J.P., and Schoonbeek, H.J.** (2009). The ABC transporter *BcatrB* from  
1183 *Botrytis cinerea* exports camalexin and is a virulence factor on *Arabidopsis thaliana*. *Plant J.* **58**,  
1184 499-510, doi/10.1111/j.1365-313X.2009.03794.x.

- 1185 **Stergiopoulos, I. and de Wit, P.J.** (2009). Fungal effector proteins. *Annu. Rev. Phytopathol.* **47**,  
1186 233-263, doi/10.1146/annurev.phyto.112408.132637.
- 1187 **Stuart, J.M., Segal, E., Koller, D., and Kim, S.K.** (2003). A gene-coexpression network for  
1188 global discovery of conserved genetic modules. *Science* **302**, 249-255,  
1189 doi/10.1126/science.1087447.
- 1190 **Swierzy, I.J., Handel, U., Kaefer, A., Jarek, M., Scharfe, M., Schluter, D., and Luder,**  
1191 **C.G.K.** (2017). Divergent co-transcriptomes of different host cells infected with *Toxoplasma*  
1192 *gondii* reveal cell type-specific host-parasite interactions. *Sci. Rep.* **7**, w, doi/10.1038/s41598-  
1193 017-07838-w.
- 1194 **Tang, D., Wang, G., and Zhou, J.M.** (2017). Receptor Kinases in Plant-Pathogen Interactions:  
1195 More Than Pattern Recognition. *Plant Cell* **29**, 618-637, doi/10.1105/tpc.16.00891.
- 1196 **Tayal, P., Raj, S., Sharma, E., Kumar, M., Dayaman, V., Verma, N., Jogawat, A., Dua, M.,**  
1197 **Kapoor, R., and Johri, A.K.** (2017). A *Botrytis cinerea* KLP-7 Kinesin acts as a Virulence  
1198 Determinant during Plant Infection. *Sci. Rep.* **7**, 5, doi/10.1038/s41598-017-09409-5.
- 1199 **ten Have, A., Dekkers, E., Kay, J., Phylip, L.H., and van Kan, J.A.** (2004). An aspartic  
1200 proteinase gene family in the filamentous fungus *Botrytis cinerea* contains members with novel  
1201 features. *Microbiology* **150**, 2475-2489, doi/10.1099/mic.0.27058-0.
- 1202 **ten Have, A., Espino, J.J., Dekkers, E., Van Sluyter, S.C., Brito, N., Kay, J., Gonzalez, C.,**  
1203 **and van Kan, J.A.** (2010). The *Botrytis cinerea* aspartic proteinase family. *Fungal Genet. Biol.*  
1204 **47**, 53-65, doi/10.1016/j.fgb.2009.10.008.
- 1205 **Tien-chye Tan, Daniel Kracher, Rosaria Gandini, Christoph Sygmund, Roman Kittl,**  
1206 **Dietmar Haltrich, B Martin Hällberg, Roland Ludwig, and Christina Divne** (2015).  
1207 Structural basis for cellobiose dehydrogenase action during oxidative cellulose degradation. **6**,  
1208 7542, doi/10.1038/ncomms8542.
- 1209 **Toruno, T.Y., Stergiopoulos, I., and Coaker, G.** (2016). Plant-Pathogen Effectors: Cellular  
1210 Probes Interfering with Plant Defenses in Spatial and Temporal Manners. *Annu. Rev.*  
1211 *Phytopathol.* **54**, 419-441, doi/10.1146/annurev-phyto-080615-100204.
- 1212 **Tsuda, K. and Katagiri, F.** (2010). Comparing signaling mechanisms engaged in pattern-  
1213 triggered and effector-triggered immunity. *Curr. Opin. Plant Biol.* **13**, 459-465,  
1214 doi/10.1016/j.pbi.2010.04.006.
- 1215 **Urlacher, V.B. and Girhard, M.** (2012). Cytochrome P450 monooxygenases: an update on  
1216 perspectives for synthetic application. *Trends Biotechnol.* **30**, 26-36,  
1217 doi/10.1016/j.tibtech.2011.06.012.
- 1218 **Van Kan, J.A., Stassen, J.H., Mosbach, A., Van Der Lee, T A, Faino, L., Farmer, A.D.,**  
1219 **Papasotiriou, D.G., Zhou, S., Seidl, M.F., Cottam, E., Edel, D., Hahn, M., Schwartz, D.C.,**  
1220 **Dietrich, R.A., Widdison, S., and Scalliet, G.** (2017). A gapless genome sequence of the  
1221 fungus *Botrytis cinerea*. *Mol. Plant. Pathol.* **18**, 75-89, doi/10.1111/mpp.12384.
- 1222 **Van Vu, B., Itoh, K., Nguyen, Q.B., Tosa, Y., and Nakayashiki, H.** (2012). Cellulases  
1223 belonging to glycoside hydrolase families 6 and 7 contribute to the virulence of *Magnaporthe*  
1224 *oryzae*. *Mol. Plant Microbe Interact.* **25**, 1135-1141, doi/10.1094/MPMI-02-12-0043-R.
- 1225 **Venables, W.N. and Ripley, B.D.** (2002). *Modern Applied Statistics with S*, Fourth Edition ed.  
1226 (New York: Springer).



- 1227 **Walker, A.S., Gladieux, P., Decognet, V., Fermaud, M., Confais, J., Roudet, J., Bardin, M.,**  
1228 **Bout, A., Nicot, P.C., Poncet, C., and Fournier, E.** (2015). Population structure and temporal  
1229 maintenance of the multihost fungal pathogen *Botrytis cinerea*: causes and implications for  
1230 disease management. *Environ. Microbiol.* **17**, 1261-1274, doi/10.1111/1462-2920.12563.
- 1231 **Walz, A., Zingen-Sell, I., Loeffler, M., and Sauer, M.** (2008). Expression of an oxalate oxidase  
1232 gene in tomato and severity of disease caused by *Botrytis cinerea* and *Sclerotinia sclerotiorum*.  
1233 **57**, 453-458, doi/10.1111/j.1365-3059.2007.01815.x.
- 1234 **Wang, C.M., Hopson, R., Lin, X., and Cane, D.E.** (2009). Biosynthesis of the sesquiterpene  
1235 botrydial in *Botrytis cinerea*. Mechanism and stereochemistry of the enzymatic formation of  
1236 presilphiperfolan-8beta-ol. *J. Am. Chem. Soc.* **131**, 8360-8361, doi/10.1021/ja9021649.
- 1237 **Weiberg, A., Wang, M., Lin, F.M., Zhao, H., Zhang, Z., Kaloshian, I., Huang, H.D., and**  
1238 **Jin, H.** (2013). Fungal small RNAs suppress plant immunity by hijacking host RNA interference  
1239 pathways. *Science* **342**, 118-123, doi/10.1126/science.1239705.
- 1240 **Westermann, A.J., Barquist, L., and Vogel, J.** (2017). Resolving host-pathogen interactions by  
1241 dual RNA-seq. *PLoS Pathog.* **13**, e1006033, doi/10.1371/journal.ppat.1006033.
- 1242 **Williamson, B., Tudzynski, B., Tudzynski, P., and van Kan, J.A.** (2007). *Botrytis cinerea*: the  
1243 cause of grey mould disease. *Mol. Plant. Pathol.* **8**, 561-580, doi/10.1111/j.1364-  
1244 3703.2007.00417.x.
- 1245 **Windram, O., Madhou, P., McHattie, S., Hill, C., Hickman, R., Cooke, E., Jenkins, D.J.,**  
1246 **Penfold, C.A., Baxter, L., Breeze, E., Kiddle, S.J., Rhodes, J., Atwell, S., Kliebenstein, D.J.,**  
1247 **Kim, Y.S., Stegle, O., Borgwardt, K., Zhang, C., Tabrett, A., Legaie, R., Moore, J.,**  
1248 **Finkenstadt, B., Wild, D.L., Mead, A., Rand, D., Beynon, J., Ott, S., Buchanan-Wollaston,**  
1249 **V., and Denby, K.J.** (2012). *Arabidopsis* defense against *Botrytis cinerea*: chronology and  
1250 regulation deciphered by high-resolution temporal transcriptomic analysis. *Plant Cell* **24**, 3530-  
1251 3557, doi/10.1105/tpc.112.102046.
- 1252 **Xie, D.X., Feys, B.F., James, S., Nieto-Rostro, M., and Turner, J.G.** (1998). COI1: an  
1253 *Arabidopsis* gene required for jasmonate-regulated defense and fertility. *Science* **280**, 1091-  
1254 1094, doi/10.1126/science.280.5366.1091.
- 1255 **Xu, J., Meng, J., Meng, X., Zhao, Y., Liu, J., Sun, T., Liu, Y., Wang, Q., and Zhang, S.**  
1256 (2016). Pathogen-Responsive MPK3 and MPK6 Reprogram the Biosynthesis of Indole  
1257 Glucosinolates and Their Derivatives in *Arabidopsis* Immunity. *Plant Cell* **28**, 1144-1162,  
1258 doi/10.1105/tpc.15.00871.
- 1259 **Xu, L., Liu, F., Lechner, E., Genschik, P., Crosby, W.L., Ma, H., Peng, W., Huang, D., and**  
1260 **Xie, D.** (2002). The SCF(COI1) ubiquitin-ligase complexes are required for jasmonate response  
1261 in *Arabidopsis*. *Plant Cell* **14**, 1919-1935, doi/10.1105/tpc.003368.
- 1262 **Zamocky, M., Ludwig, R., Peterbauer, C., Hallberg, B.M., Divne, C., Nicholls, P., and**  
1263 **Haltrich, D.** (2006). Cellobiose dehydrogenase--a flavocytochrome from wood-degrading,  
1264 phytopathogenic and saprotrophic fungi. *Curr. Protein Pept. Sci.* **7**, 255-280,  
1265 doi/10.2174/138920306777452367.
- 1266 **Zhang, B. and Horvath, S.** (2005). A general framework for weighted gene co-expression  
1267 network analysis. *Stat. Appl. Genet. Mol. Biol.* **4**, 6115.1128. Epub 2005 Aug 12,  
1268 doi/10.2202/1544-6115.1128.



- 1269 **Zhang, W., Kwon, S.T., Chen, F., and Kliebenstein, D.J.** (2016). Isolate Dependency of  
1270 Brassica rapa Resistance QTLs to Botrytis cinerea. *Front. Plant. Sci.* **7**, 161,  
1271 doi/10.3389/fpls.2016.00161.
- 1272 **Zhang, W., Corwin, J.A., Copeland, D., Feusier, J., Eshbaugh, R., Chen, F., Atwell, S., and**  
1273 **Kliebenstein, D.J.** (2017). Plastic Transcriptomes Stabilize Immunity to Pathogen Diversity:  
1274 The Jasmonic Acid and Salicylic Acid Networks within the Arabidopsis/Botrytis Pathosystem.  
1275 *Plant Cell* **29**, 2727-2752, doi/10.1105/tpc.17.00348.
